# Supplementary material for: A Novel Spo11 Homologue Functions as a Positive Regulator in Cyst Differentiation in Giardia lamblia
Source: Int J Mol Sci. 2021 Nov 2;22(21):11902. doi: 10.3390/ijms222111902 (PMC8584520; doi:10.3390/ijms222111902)
Supplement: Supplementary file 1 [file ijms-22-11902-s001.zip › S1 to S9 and Table S2.pdf]

Figure S1

|                                                                                                                                                                                                                                                                                                                                                                                                                                                                                                                                                                                                                                                                                                                                                                                                                                                                                                                                                                                                                                                                                                                                                                                                                                                                                                                                                                                                                                                                                                                                                                                                                                                                                                                                                                                                                                                                                                                                                                                                                                                                                                                                                                                                                                                                                                                                                                                                                                                                                                                                                                                                                                                                                                                                                                                                                                                                                                                                                                                                                                                                                                                                                                                                                                                                                                                                                                                                                                                                                                                                                                                                                                                                                                                                                                                                                                                                                                                                                                                                                                                                                                                                                                                                                                                                                                                                                                                                                                                                                                                                                                                                                                                                                                                                                                                                                                                                                                                                                                                                                                                                                                                                                                                                                                                                                                                                                                                                               |                                                                                                                                                                                                                                                                                                                                                                                                                                                                                                                                                                                                                                                                                                                                                                                                                                                                                                                                                                                                                                                                                                                                                                                                                                                                                                                                                                                                                                                                                                                                                                                                                                                                                                                                                                                                                                                                                                                                                                                                                                                                                                                                                                                                                                                                                                                                                                                                                                                                                                                                                                                                                                                                                                                                                                                                                                                                                                                                                                                                                                                                                                                                                                                                                                                                                                                                                                                                                                                                                                                                                                                                                                                                                                                                                                                                                                                                                                                                                                                                                                                                                                                                                                                                                                                                                                                                                                                                                                                                                                                                                                                                                                                                                                                    |
|---------------------------------------------------------------------------------------------------------------------------------------------------------------------------------------------------------------------------------------------------------------------------------------------------------------------------------------------------------------------------------------------------------------------------------------------------------------------------------------------------------------------------------------------------------------------------------------------------------------------------------------------------------------------------------------------------------------------------------------------------------------------------------------------------------------------------------------------------------------------------------------------------------------------------------------------------------------------------------------------------------------------------------------------------------------------------------------------------------------------------------------------------------------------------------------------------------------------------------------------------------------------------------------------------------------------------------------------------------------------------------------------------------------------------------------------------------------------------------------------------------------------------------------------------------------------------------------------------------------------------------------------------------------------------------------------------------------------------------------------------------------------------------------------------------------------------------------------------------------------------------------------------------------------------------------------------------------------------------------------------------------------------------------------------------------------------------------------------------------------------------------------------------------------------------------------------------------------------------------------------------------------------------------------------------------------------------------------------------------------------------------------------------------------------------------------------------------------------------------------------------------------------------------------------------------------------------------------------------------------------------------------------------------------------------------------------------------------------------------------------------------------------------------------------------------------------------------------------------------------------------------------------------------------------------------------------------------------------------------------------------------------------------------------------------------------------------------------------------------------------------------------------------------------------------------------------------------------------------------------------------------------------------------------------------------------------------------------------------------------------------------------------------------------------------------------------------------------------------------------------------------------------------------------------------------------------------------------------------------------------------------------------------------------------------------------------------------------------------------------------------------------------------------------------------------------------------------------------------------------------------------------------------------------------------------------------------------------------------------------------------------------------------------------------------------------------------------------------------------------------------------------------------------------------------------------------------------------------------------------------------------------------------------------------------------------------------------------------------------------------------------------------------------------------------------------------------------------------------------------------------------------------------------------------------------------------------------------------------------------------------------------------------------------------------------------------------------------------------------------------------------------------------------------------------------------------------------------------------------------------------------------------------------------------------------------------------------------------------------------------------------------------------------------------------------------------------------------------------------------------------------------------------------------------------------------------------------------------------------------------------------------------------------------------------------------------------------------------------------------------------------------------------------|--------------------------------------------------------------------------------------------------------------------------------------------------------------------------------------------------------------------------------------------------------------------------------------------------------------------------------------------------------------------------------------------------------------------------------------------------------------------------------------------------------------------------------------------------------------------------------------------------------------------------------------------------------------------------------------------------------------------------------------------------------------------------------------------------------------------------------------------------------------------------------------------------------------------------------------------------------------------------------------------------------------------------------------------------------------------------------------------------------------------------------------------------------------------------------------------------------------------------------------------------------------------------------------------------------------------------------------------------------------------------------------------------------------------------------------------------------------------------------------------------------------------------------------------------------------------------------------------------------------------------------------------------------------------------------------------------------------------------------------------------------------------------------------------------------------------------------------------------------------------------------------------------------------------------------------------------------------------------------------------------------------------------------------------------------------------------------------------------------------------------------------------------------------------------------------------------------------------------------------------------------------------------------------------------------------------------------------------------------------------------------------------------------------------------------------------------------------------------------------------------------------------------------------------------------------------------------------------------------------------------------------------------------------------------------------------------------------------------------------------------------------------------------------------------------------------------------------------------------------------------------------------------------------------------------------------------------------------------------------------------------------------------------------------------------------------------------------------------------------------------------------------------------------------------------------------------------------------------------------------------------------------------------------------------------------------------------------------------------------------------------------------------------------------------------------------------------------------------------------------------------------------------------------------------------------------------------------------------------------------------------------------------------------------------------------------------------------------------------------------------------------------------------------------------------------------------------------------------------------------------------------------------------------------------------------------------------------------------------------------------------------------------------------------------------------------------------------------------------------------------------------------------------------------------------------------------------------------------------------------------------------------------------------------------------------------------------------------------------------------------------------------------------------------------------------------------------------------------------------------------------------------------------------------------------------------------------------------------------------------------------------------------------------------------------------------------------------------|
| <p> <i>GlSpol1</i> 1 -----MCD<b>DL</b>LGHQDDRAI<br/> <i>AtSpol1-1</i> 1 -----MEGKFAI-----SEST-----NLQCR<b>AD</b>DF-----<br/> <i>HisSpol1</i> 1 -----MAFAPM-----GPEA-----SFFDL<b>DR</b>H-----<br/> <i>MmSpol1</i> 1 -----MAFAPM-----GPEA-----SFFDAL<b>DR</b>H-----<br/> <i>ScSpol1</i> 1 MALEGLRKKYKTRQELVKALTPKRRSIHLNSNGHSNGTPCSNADVLAR<b>IK</b>HFL-SLAANS<br/> <i>SpRtc12</i> 1 -----NNG<b>DR</b>I-KKVVR<b>EW</b><br/> <i>MjTOP6A</i> 1 -----VKLP<b>A</b>SGKPREIAK<b>GK</b><br/> <i>SsTOP6A</i> 1 -----MSS-----EFISK<b>VD</b>SKARRKAANI </p> <p> <i>GlSpol1</i> 16 LEL-YRRILLO<b>LV</b>QVESSA-----AG-----LIDPMSE<b>QD</b>LQDK-----<br/> <i>AtSpol1-1</i> 21 -----TQSVVVD<b>FA</b>EC-RSE<b>PH</b>SI--NQFRN-YCHNP<b>EA</b>DC-----CSDSK<br/> <i>HisSpol1</i> 20 -----RSE<b>LA</b>AE<b>SG</b>GRFP<b>CG</b>GRHAKRPDSVGC<b>DN</b>V<b>DR</b>C<b>TR</b>--<b>DR</b>-IRSDS<br/> <i>MmSpol1</i> 20 -----RAS<b>LA</b>AMV<b>KG</b>AGET<b>AG</b>ATRVASRPDSV<b>GR</b>MI<b>PQ</b>C<b>TR</b>--<b>DR</b>-IRSDS<br/> <i>ScSpol1</i> 60 LEHQQQPISIVFONKK<b>KG</b>DTSS<b>DR</b>HTTLD-----FP<b>NG</b>PH<b>LC</b>-----<br/> <i>SpRtc12</i> 14 -----IEQFVHD<b>FC</b>PS<b>PT</b>TRDS<b>VN</b>VA-----LRRRKHSWNGSL<b>DR</b>K<b>AK</b>ER<b>KQ</b>K<b>VP</b>-----<br/> <i>MjTOP6A</i> 19 -----ITELAK<b>MY</b>D<b>DR</b>CK<b>GR</b>--<b>DR</b>I-----TMP<b>TS</b>GS<b>HA</b>MF<b>DK</b>KKSG<b>FT</b>L<b>VGK</b><br/> <i>SsTOP6A</i> 21 -----LRDKFLN<b>LV</b>Q<b>DR</b>CK<b>GR</b>EPL<b>VM</b>EH-----PMRT<b>LS</b>NA<b>LV</b>DE<b>KR</b>L<b>LL</b>LG<b>K</b> </p> <p> <i>GlSpol1</i> 50 -----KGISFKR<b>HP</b>LE<b>FA</b>RA<b>LE</b>MIASACAV<b>KK</b>EPVNI<b>SL</b>Y<b>TAP</b>SS<b>DR</b>-----<br/> <i>AtSpol1-1</i> 59 <b>PG</b>Q<b>GI</b>FT<b>LK</b>KE<b>Q</b>TY<b>ED</b>ML<b>DR</b>VL<b>VO</b>Q<b>EN</b>RHASK<b>RD</b>I<b>Y</b>MM<b>HP</b>SA-----<br/> <i>HisSpol1</i> 67 <b>PS</b>-----AC<b>PE</b>L<b>LI</b>ES<b>MI</b>Y<b>VC</b>SV<b>AK</b>RD<b>IY</b>TD<b>SC</b>-----<br/> <i>MmSpol1</i> 67 <b>PS</b>-----V<b>SE</b>L<b>LI</b>ES<b>MI</b>Y<b>VC</b>SV<b>AK</b>RD<b>IY</b>TD<b>SC</b>-----<br/> <i>ScSpol1</i> 101 -----HQFK<b>LE</b>CHILNL<b>KK</b>V<b>ME</b>K<b>PL</b>GN<b>TV</b>ED<b>IF</b>SN<b>VE</b>-----<br/> <i>SpRtc12</i> 63 -----S<b>FP</b>RNET<b>TH</b>Q<b>LF</b>RV<b>DC</b>V<b>EA</b>V<b>IS</b>D<b>VI</b>K<b>ED</b>I<b>Y</b>RD<b>VD</b>-----<br/> <i>MjTOP6A</i> 63 <b>DA</b>-----RTLT<b>YN</b>Q<b>AE</b>IT<b>AT</b>TT<b>KE</b>EP<b>AK</b>Q<b>DR</b>ED<b>DP</b>SG<b>EA</b>Y<b>Y</b>SK<b>N</b>-----<br/> <i>SsTOP6A</i> 65 KLRR<b>NP</b>-----LD<b>NE</b>AK<b>RE</b>MT<b>VL</b>MA<b>SE</b>I<b>Y</b>DA<b>LV</b>SE<b>YP</b><b>DR</b>EA<b>Y</b>Y<b>RG</b>HS<b>LL</b>KS<b>IE</b>GN<b>K</b> </p> <p> <i>GlSpol1</i> 94 -----YGS<b>CI</b>QSN<b>VL</b>AE<b>FC</b>FG<b>Y</b>SE<b>EE</b>MMHYRAA<b>AK</b>G<b>DL</b>EN<b>CT</b>MT<b>VO</b>V-----<b>GR</b>-<br/> <i>AtSpol1-1</i> 109 -----PKA<b>CI</b>SV<b>DR</b>AI<b>GD</b>IC<b>IL</b>F<b>QC</b>-S<b>RY</b>N<b>DN</b>V<b>VS</b>V<b>GN</b>G<b>LV</b>MG<b>W</b>K<b>FR</b>DA-----<b>GR</b>K<br/> <i>HisSpol1</i> 106 -----G<b>NT</b>Q<b>TV</b>DN<b>IE</b>ND<b>IS</b>CM<b>LK</b>V-S<b>RS</b>SH<b>IL</b>ST<b>SK</b>G<b>LI</b>AG<b>NP</b>AY<b>IE</b>ED-----<b>GR</b>K<br/> <i>MmSpol1</i> 106 -----G<b>NT</b>Q<b>TV</b>DN<b>IE</b>ND<b>IS</b>CM<b>LK</b>V-S<b>RS</b>SH<b>IL</b>ST<b>SK</b>G<b>LI</b>AG<b>NP</b>AY<b>IE</b>ED-----<b>GR</b>K<br/> <i>ScSpol1</i> 141 -----G<b>RC</b>AN<b>VQ</b>W<b>LD</b>V<b>RF</b>N<b>FK</b>L<b>SP</b>R<b>KS</b>DN<b>IP</b>A<b>Q</b>KG<b>LV</b>Y<b>S</b>FF<b>PI</b>DI<b>YD</b>-----<b>NI</b>-<br/> <i>SpRtc12</i> 104 -----K<b>RT</b>Q<b>TV</b>DE<b>LL</b>CG<b>IS</b>NT<b>IG</b>C-S<b>RS</b>DN<b>VE</b>AS<b>AK</b>G<b>LV</b>Y<b>S</b>FF<b>PI</b>DI<b>YD</b>-----<b>GR</b>V<br/> <i>MjTOP6A</i> 109 -----G<b>EAR</b>DD<b>Q</b>AS<b>NN</b>V<b>DE</b>EA<b>AL</b>GV-L<b>SE</b>H<b>CG</b>FI<b>PE</b>ED<b>GS</b>SV<b>VD</b>HA<b>SE</b>TF<b>EG</b>EL<b>V</b><br/> <i>SsTOP6A</i> 122 I<b>VS</b>SE<b>NT</b>D<b>SK</b>ES<b>GV</b>Y<b>VF</b>VT<b>VL</b>L<b>SE</b>N<b>LA</b>SE<b>KG</b>-K<b>Y</b>Q<b>DL</b>EA<b>RS</b>GN-----<b>DV</b>- </p> <p> <i>GlSpol1</i> 141 --V<b>EA</b>SS<b>LV</b>--V<b>PE</b>EP<b>FF</b>Y<b>IQ</b>-----CH<b>TD</b>A<b>Q</b>VL<b>VE</b>K<b>DT</b><b>PH</b>ED<b>SY</b>EA<b>I</b><br/> <i>AtSpol1-1</i> 156 <b>FD</b>CL<b>NS</b>L<b>NT</b>--V<b>PE</b>VL<b>VE</b>EE-----DV<b>SL</b>A<b>BY</b>VL<b>VE</b>K<b>DT</b><b>PH</b>ED<b>SY</b>EA<b>I</b><br/> <i>HisSpol1</i> 154 V<b>NC</b>IC-G<b>AT</b>--V<b>AV</b>GS<b>NI</b>Q<b>GR</b>-----NL<b>VT</b>DA<b>Q</b>VL<b>VE</b>K<b>DT</b><b>PH</b>ED<b>SY</b>EA<b>I</b><br/> <i>MmSpol1</i> 154 V<b>NC</b>IC-S<b>AT</b>--V<b>AV</b>GS<b>NI</b>Q<b>GR</b>-----NL<b>VT</b>DA<b>Q</b>VL<b>VE</b>K<b>DT</b><b>PH</b>ED<b>SY</b>EA<b>I</b><br/> <i>ScSpol1</i> 189 L<b>CS</b>EN<b>EP</b>K<b>MK</b>Q<b>CT</b>IP<b>CK</b>PL<b>CF</b>FF<b>Q</b>DD<b>AV</b>IL<b>CS</b>EN<b>VE</b>VS<b>VE</b>AV<b>FL</b>AV<b>NY</b>H<b>EL</b><br/> <i>SpRtc12</i> 152 I<b>TA</b>KK-----P<b>LI</b>LS<b>HR</b>HS-----S<b>IT</b>AK<b>ML</b>VL<b>VE</b>K<b>AV</b>Q<b>CT</b>EA<b>LA</b>D<br/> <i>MjTOP6A</i> 165 <b>VD</b>CK<b>LG</b>T<b>G</b>--V<b>Y</b>NI<b>ND</b>VT<b>KL</b>-----N<b>LE</b>TD<b>AD</b>PH<b>LA</b>TS<b>GM</b>PA<b>RL</b>NA<b>ER</b>Q<b>WD</b><br/> <i>SsTOP6A</i> 176 <b>DL</b>E<b>K</b>T<b>IG</b>H--V<b>Y</b>LE<b>FP</b>FL<b>ED</b>-----P<b>LD</b>VA<b>Q</b>VL<b>VE</b>K<b>DT</b><b>PH</b>ED<b>SY</b>EA<b>I</b> </p> | <p> <i>GlSpol1</i> 188 K<b>DR</b>L<b>G</b>Q<b>S</b>W<b>Y</b>IG<b>Q</b>Q<b>VP</b>DA<b>AL</b><b>SL</b>S<b>FP</b><b>DR</b>-S<b>CR</b>-I--P<b>DR</b>CA<b>DR</b>AB<b>EN</b><b>DR</b>CT<b>AV</b>Q<br/> <i>AtSpol1-1</i> 205 --T<b>RR</b>SV<b>IT</b>Q<b>Q</b>Q<b>VP</b>DA<b>AL</b><b>SL</b>S<b>FP</b><b>DR</b>-S<b>CR</b>-I--P<b>DR</b>CA<b>DR</b>AB<b>EN</b><b>DR</b>CT<b>AV</b>Q<br/> <i>HisSpol1</i> 202 --K-L<b>S</b>PC<b>IM</b>IT<b>GK</b>Q<b>VP</b>DA<b>AL</b><b>SL</b>S<b>FP</b><b>DR</b>-S<b>CR</b>-I--P<b>DR</b>CA<b>DR</b>AB<b>EN</b><b>DR</b>CT<b>AV</b>Q<br/> <i>MmSpol1</i> 202 --R-M<b>S</b>PC<b>IM</b>IT<b>GK</b>Q<b>VP</b>DA<b>AL</b><b>SL</b>S<b>FP</b><b>DR</b>-S<b>CR</b>-I--P<b>DR</b>CA<b>DR</b>AB<b>EN</b><b>DR</b>CT<b>AV</b>Q<br/> <i>ScSpol1</i> 249 ----S<b>T</b>N<b>ML</b>IT<b>GK</b>Q<b>VP</b>DA<b>AL</b><b>SL</b>S<b>FP</b><b>DR</b>-S<b>CR</b>-I--P<b>DR</b>CA<b>DR</b>AB<b>EN</b><b>DR</b>CT<b>AV</b>Q<br/> <i>SpRtc12</i> 195 ----T<b>RV</b>AK<b>GP</b>DA<b>AL</b><b>SL</b>S<b>FP</b><b>DR</b>-S<b>CR</b>-I--P<b>DR</b>CA<b>DR</b>AB<b>EN</b><b>DR</b>CT<b>AV</b>Q<br/> <i>MjTOP6A</i> 213 ----K<b>H</b>NC<b>IL</b>VL<b>SK</b>Q<b>VP</b>DA<b>AL</b><b>SL</b>S<b>FP</b><b>DR</b>-S<b>CR</b>-I--P<b>DR</b>CA<b>DR</b>AB<b>EN</b><b>DR</b>CT<b>AV</b>Q<br/> <i>SsTOP6A</i> 225 ----Q<b>Y</b>KS<b>IL</b>IS<b>AG</b>Q<b>VP</b>DA<b>AL</b><b>SL</b>S<b>FP</b><b>DR</b>-S<b>CR</b>-I--P<b>DR</b>CA<b>DR</b>AB<b>EN</b><b>DR</b>CT<b>AV</b>Q </p> <p> <i>GlSpol1</i> 243 <b>SA</b>AT<b>RK</b>SV<b>PN</b>HYIA<b>SL</b>VP<b>IC</b>VP<b>NS</b>SH<b>DR</b>SS<b>KA</b>IK<b>GS</b>R-----H<b>CD</b>PA<b>DR</b>CL<b>Y</b>-<br/> <i>AtSpol1-1</i> 257 <b>SM</b>Q<b>AY</b>--D<b>IE</b>S<b>RA</b>CD<b>MK</b>W<b>GA</b>PP<b>DS</b>EV<b>YS</b>V<b>VP</b>Q<b>C</b>-----L<b>PT</b>TE<b>ED</b>K<b>RT</b>E-<br/> <i>HisSpol1</i> 255 <b>SG</b>Q<b>Q</b>--<b>BA</b>HT<b>TP</b>DA<b>IR</b>W<b>GL</b>LL<b>PD</b>KK<b>LD</b>Q<b>PS</b>-----L<b>PT</b>TE<b>ED</b>K<b>RT</b>E-<br/> <i>MmSpol1</i> 255 <b>SG</b>Q<b>Q</b>--<b>BA</b>HT<b>TP</b>DA<b>IR</b>W<b>GL</b>LL<b>PD</b>KK<b>LD</b>Q<b>PS</b>-----L<b>PT</b>TE<b>ED</b>K<b>RT</b>E-<br/> <i>ScSpol1</i> 304 <b>N</b>ERN<b>AY</b>-----I<b>CT</b>MA<b>NY</b>CR<b>IT</b>Q<b>VL</b>Q<b>AC</b>NE<b>VH</b>N-----K<b>SI</b>Q<b>LS</b>EN<b>QR</b>D<b>Y</b>SL<b>AK</b><br/> <i>SpRtc12</i> 245 <b>SN</b>AY<b>SH</b>--<b>B</b>PH<b>SQ</b>-L<b>R</b>NE<b>QL</b>Q<b>LY</b>ED<b>FN</b>K<b>Q</b>E-----F<b>SL</b>K<b>EN</b>K<b>RD</b>Y<b>MIT</b><br/> <i>MjTOP6A</i> 266 <b>SK</b>ATH--L<b>AD</b>R<b>SC</b>DA<b>RL</b>Q<b>VT</b>Q<b>DR</b>ID<b>YL</b>Q<b>TP</b>-----L<b>SD</b>Q<b>ED</b>Q<b>RE</b>K<br/> <i>SsTOP6A</i> 277 <b>SH</b>SL<b>SY</b>--<b>S</b>ER<b>AT</b>DA<b>KE</b>LV<b>SM</b>Q<b>DF</b>GN<b>SR</b>K<b>PY</b>LS<b>EA</b>ER<b>KNY</b>IK<b>AK</b>DA<b>DR</b>E<b>AE</b> </p> <p> <i>GlSpol1</i> 293 <b>D</b>IT<b>RL</b>T<b>AL</b>GR<b>LE</b>W<b>AN</b>S-----V<b>Q</b>NE<b>AL</b>GM<b>QY</b>Q<b>ET</b>IL<b>GQ</b>EG<b>GL</b>SV<b>YV</b>--V<b>ET</b><br/> <i>AtSpol1-1</i> 305 <b>AD</b>L<b>RC</b>Q<b>L</b>K<b>RE</b>W<b>RL</b>S-----<b>ET</b>Y<b>KR</b>Q<b>W</b>Q<b>RE</b>ED<b>SV</b>HS<b>LS</b>SV<b>YV</b>Q<b>RE</b><br/> <i>HisSpol1</i> 303 <b>SL</b>ER<b>Q</b>VT<b>CO</b>Q<b>RE</b>S-----V<b>ET</b>Y<b>KR</b>Q<b>W</b>Q<b>RE</b>ED<b>SV</b>HS<b>LS</b>SV<b>YV</b>Q<b>RE</b><br/> <i>MmSpol1</i> 303 <b>SL</b>ER<b>Q</b>VT<b>CO</b>Q<b>RE</b>S-----V<b>ET</b>Y<b>KR</b>Q<b>W</b>Q<b>RE</b>ED<b>SV</b>HS<b>LS</b>SV<b>YV</b>Q<b>RE</b><br/> <i>ScSpol1</i> 351 <b>N</b>LIA-----S<b>L</b>T<b>AN</b>S<b>Q</b>I<b>AT</b>S<b>PL</b>K<b>N</b>V<b>IE</b>Q<b>RE</b>EF<b>Q</b>KK<b>AE</b>NE<b>ID</b>AR<b>IF</b>Q<b>RE</b>-----<br/> <i>SpRtc12</i> 290 <b>T</b>ED<b>FG</b>Q<b>Q</b>-Q<b>KE</b>Q<b>Y</b>Q<b>RE</b>Q-----Q<b>Q</b>W<b>FI</b>Q<b>AE</b>Q<b>Q</b>LE<b>PP</b>S-----W<b>KE</b>Q<b>RE</b><br/> <i>MjTOP6A</i> 311 <b>D</b>Q<b>K</b>ND<b>DF</b>VR<b>SF</b>Q<b>Q</b>KA-----Q<b>Q</b>-<b>ED</b>MG<b>VE</b>Q<b>Q</b>Q<b>AE</b>Y<b>GL</b>K<b>Y</b>V<b>NT</b>Y<b>LE</b>Q<b>RE</b><br/> <i>SsTOP6A</i> 334 <b>DK</b>-N<b>Q</b>W<b>PK</b>TA<b>Q</b>Q<b>RE</b>-----I<b>NT</b>FP<b>Q</b>KA<b>Q</b>Q<b>RE</b>Q<b>AE</b>Y<b>GL</b>K<b>Y</b>V<b>NT</b>Y<b>LE</b>Q<b>RE</b> </p> <p> <i>GlSpol1</i> 341 V<b>V</b>GV<b>RK</b>R<b>CN</b>FD<b>NK</b>CT<b>AT</b>RL<b>AG</b>AR<b>ANS</b>S<br/> <i>AtSpol1-1</i> 355 I<b>RE</b>R-V<b>S</b>SP-----<br/> <i>HisSpol1</i> 352 L<b>RF</b>G-Q<b>W</b>-----<br/> <i>MmSpol1</i> 352 L<b>RF</b>G-Q<b>W</b>-----<br/> <i>ScSpol1</i> -----<br/> <i>SpRtc12</i> 333 L<b>AD</b>AD<b>K</b>SK<b>H</b>-----S<b>V</b>R-----<br/> <i>MjTOP6A</i> 360 I<b>K</b>D<b>S</b>W<b>IP</b>-----<br/> <i>SsTOP6A</i> 382 I<b>T</b>N<b>K</b>-D<b>Y</b>EA----- </p> |
|---------------------------------------------------------------------------------------------------------------------------------------------------------------------------------------------------------------------------------------------------------------------------------------------------------------------------------------------------------------------------------------------------------------------------------------------------------------------------------------------------------------------------------------------------------------------------------------------------------------------------------------------------------------------------------------------------------------------------------------------------------------------------------------------------------------------------------------------------------------------------------------------------------------------------------------------------------------------------------------------------------------------------------------------------------------------------------------------------------------------------------------------------------------------------------------------------------------------------------------------------------------------------------------------------------------------------------------------------------------------------------------------------------------------------------------------------------------------------------------------------------------------------------------------------------------------------------------------------------------------------------------------------------------------------------------------------------------------------------------------------------------------------------------------------------------------------------------------------------------------------------------------------------------------------------------------------------------------------------------------------------------------------------------------------------------------------------------------------------------------------------------------------------------------------------------------------------------------------------------------------------------------------------------------------------------------------------------------------------------------------------------------------------------------------------------------------------------------------------------------------------------------------------------------------------------------------------------------------------------------------------------------------------------------------------------------------------------------------------------------------------------------------------------------------------------------------------------------------------------------------------------------------------------------------------------------------------------------------------------------------------------------------------------------------------------------------------------------------------------------------------------------------------------------------------------------------------------------------------------------------------------------------------------------------------------------------------------------------------------------------------------------------------------------------------------------------------------------------------------------------------------------------------------------------------------------------------------------------------------------------------------------------------------------------------------------------------------------------------------------------------------------------------------------------------------------------------------------------------------------------------------------------------------------------------------------------------------------------------------------------------------------------------------------------------------------------------------------------------------------------------------------------------------------------------------------------------------------------------------------------------------------------------------------------------------------------------------------------------------------------------------------------------------------------------------------------------------------------------------------------------------------------------------------------------------------------------------------------------------------------------------------------------------------------------------------------------------------------------------------------------------------------------------------------------------------------------------------------------------------------------------------------------------------------------------------------------------------------------------------------------------------------------------------------------------------------------------------------------------------------------------------------------------------------------------------------------------------------------------------------------------------------------------------------------------------------------------------------------------------------------------------------------------|--------------------------------------------------------------------------------------------------------------------------------------------------------------------------------------------------------------------------------------------------------------------------------------------------------------------------------------------------------------------------------------------------------------------------------------------------------------------------------------------------------------------------------------------------------------------------------------------------------------------------------------------------------------------------------------------------------------------------------------------------------------------------------------------------------------------------------------------------------------------------------------------------------------------------------------------------------------------------------------------------------------------------------------------------------------------------------------------------------------------------------------------------------------------------------------------------------------------------------------------------------------------------------------------------------------------------------------------------------------------------------------------------------------------------------------------------------------------------------------------------------------------------------------------------------------------------------------------------------------------------------------------------------------------------------------------------------------------------------------------------------------------------------------------------------------------------------------------------------------------------------------------------------------------------------------------------------------------------------------------------------------------------------------------------------------------------------------------------------------------------------------------------------------------------------------------------------------------------------------------------------------------------------------------------------------------------------------------------------------------------------------------------------------------------------------------------------------------------------------------------------------------------------------------------------------------------------------------------------------------------------------------------------------------------------------------------------------------------------------------------------------------------------------------------------------------------------------------------------------------------------------------------------------------------------------------------------------------------------------------------------------------------------------------------------------------------------------------------------------------------------------------------------------------------------------------------------------------------------------------------------------------------------------------------------------------------------------------------------------------------------------------------------------------------------------------------------------------------------------------------------------------------------------------------------------------------------------------------------------------------------------------------------------------------------------------------------------------------------------------------------------------------------------------------------------------------------------------------------------------------------------------------------------------------------------------------------------------------------------------------------------------------------------------------------------------------------------------------------------------------------------------------------------------------------------------------------------------------------------------------------------------------------------------------------------------------------------------------------------------------------------------------------------------------------------------------------------------------------------------------------------------------------------------------------------------------------------------------------------------------------------------------------------------------------------------------------------------|

**Fig. S1.** Alignment of the TOP6A topoisomerases and Spo11. The TOP6A topoisomerases or Spo11 from different organisms, including *Methanocaldococcus jannaschii* (Mj), *Sulfolobus shibatae* (Ss), *Arabidopsis thaliana* (At), *Homo sapiens* (Hs), *Mus musculus* (Mm), *Schizosaccharomyces pombe* (Sp), *Saccharomyces cerevisiae* (Sc), and *Giardia lamblia* (Gl) are analyzed by ClustalW 1.83 with all default settings. GenBank accession numbers for MjTOP6A, SsTOP6A, AtSpo11-1, HsSpo11, MmSpo11, SpRec12 (Spo11), ScSpo11, and GlSpo11 are WP\_010869868.1, WP\_218258439.1, NP\_187923.1, NP\_937998.1, NP\_001077429.1, NP\_593479.1, AJV27957.1, and AAP35104.1, respectively. Black boxes, gray boxes and hyphens indicate identical amino acids, conserved amino acids and gaps in the respective proteins, respectively. The catalytic important Tyrosine 88 pointed by a blue arrow was mutated to produce Spo11m1. The conserved Glu and two Asp (DxD) in the Toprim domain is indicated by a green arrow and purple diamond, respectively. Two residues, Glu202 and Arg209 in the Toprim domain of *Giardia* Spo11, were mutated to produce Spo11m2.

Figure S2

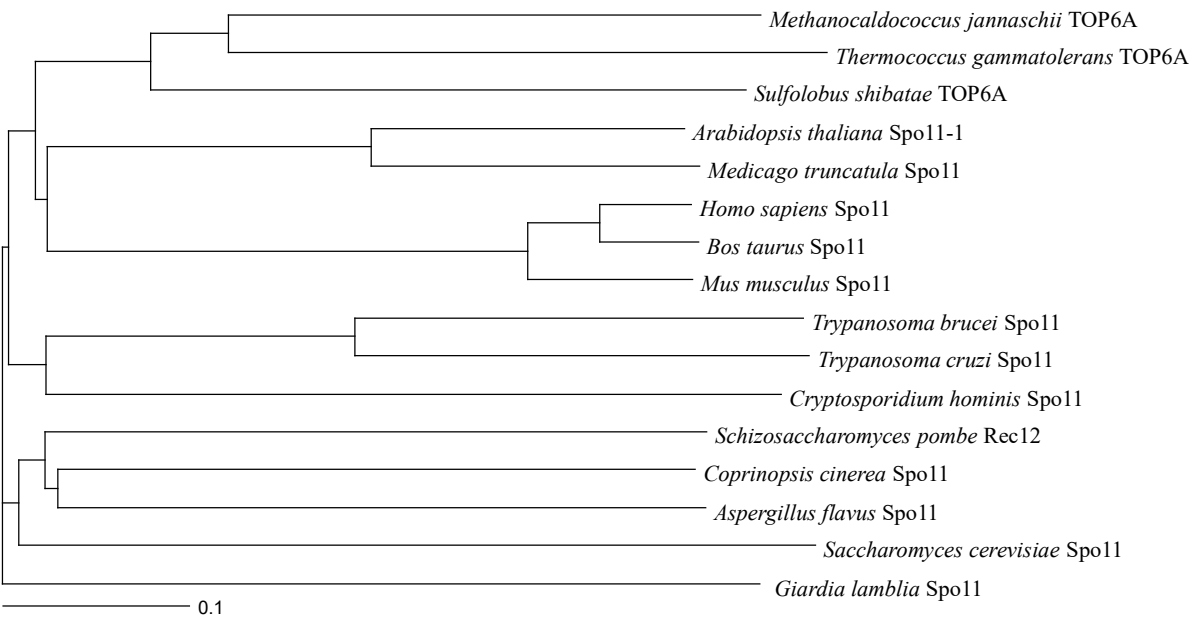

**Fig. S2. Phylogenetic analysis of the TOP6A topoisomerases and Spo11. A**

neighbor-joining phylogenetic tree was obtained from alignment of TOP6A topoisomerases and Spo11 from various organisms, including *Methanocaldococcus jannaschii* (Mj), *Thermococcus gammatolerans* (Tg), *Sulfolobus shibatae* (Ss), *Arabidopsis thaliana* (At), *Medicago truncatula* (Mt), *Homo sapiens* (Hs), *Bos Taurus* (Bt), *Mus musculus* (Mm), *Trypanosoma brucei brucei* (Tb), *Trypanosoma cruzi* (Tc), *Cryptosporidium hominis* (Ch), *Schizosaccharomyces pombe* (Sp), *Coprinopsis cinerea* (Cc), *Aspergillus flavus* (Ao), *Saccharomyces cerevisiae* (Sc), and *Giardia lamblia* (Gl). GenBank accession numbers for MjTOP6A, TgTOP6A, SsTOP6A, AtSpo11-1, MtSpo11, HsSpo11, BtSpo11, MmSpo11, TbSpo11, TcSpo11, ChSpo11, SpRec12 (Spo11), CcSpo11, AfSpo11, ScSpo11, and GlSpo11 are WP\_010869868.1, WP\_015859039.1, WP\_218258439.1, NP\_187923.1, AET00713.2, NP\_937998.1, NP\_001180019.1, NP\_001077429.1, XP\_845046.1, EKF98601.1, XP\_666249.1, NP\_593479.1, AAF26720.1, QRD90412.1, AJV27957.1, and AAP35104.1, respectively. The bootstrap values determined from 1000 trees are not shown. Values are higher than 400. 0.1 substitution per site in the protein is indicated.

Figure S3

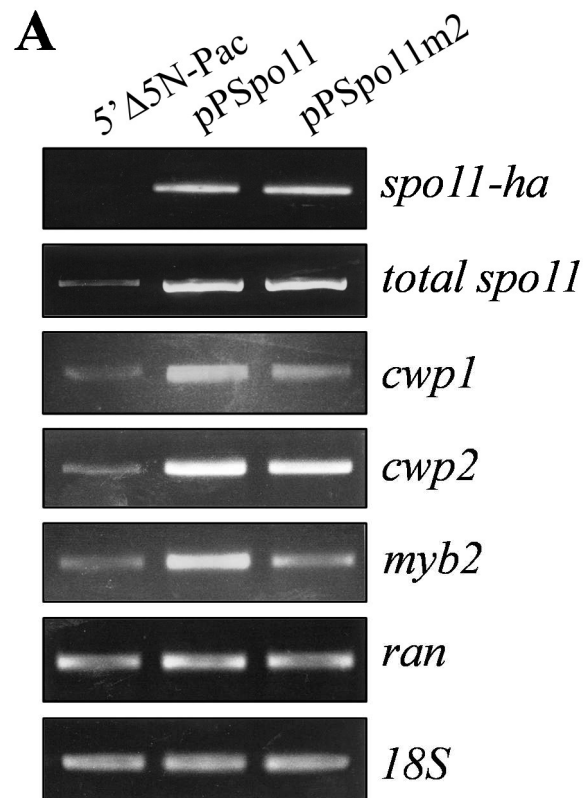

**Fig. S3. RT-PCR assays of transcript expression in the Spo11- and Spo11m2-expressing cell lines.** RNA was extracted from the 5'Δ5N-Pac, pPSpo11 and pPSpo11m2 stable transfectants cultured in growth medium. RT-PCR was performed using primers for genes indicated in the figure. As a control, similar levels of the 18S ribosomal RNA (18S) were detected.

Figure S4

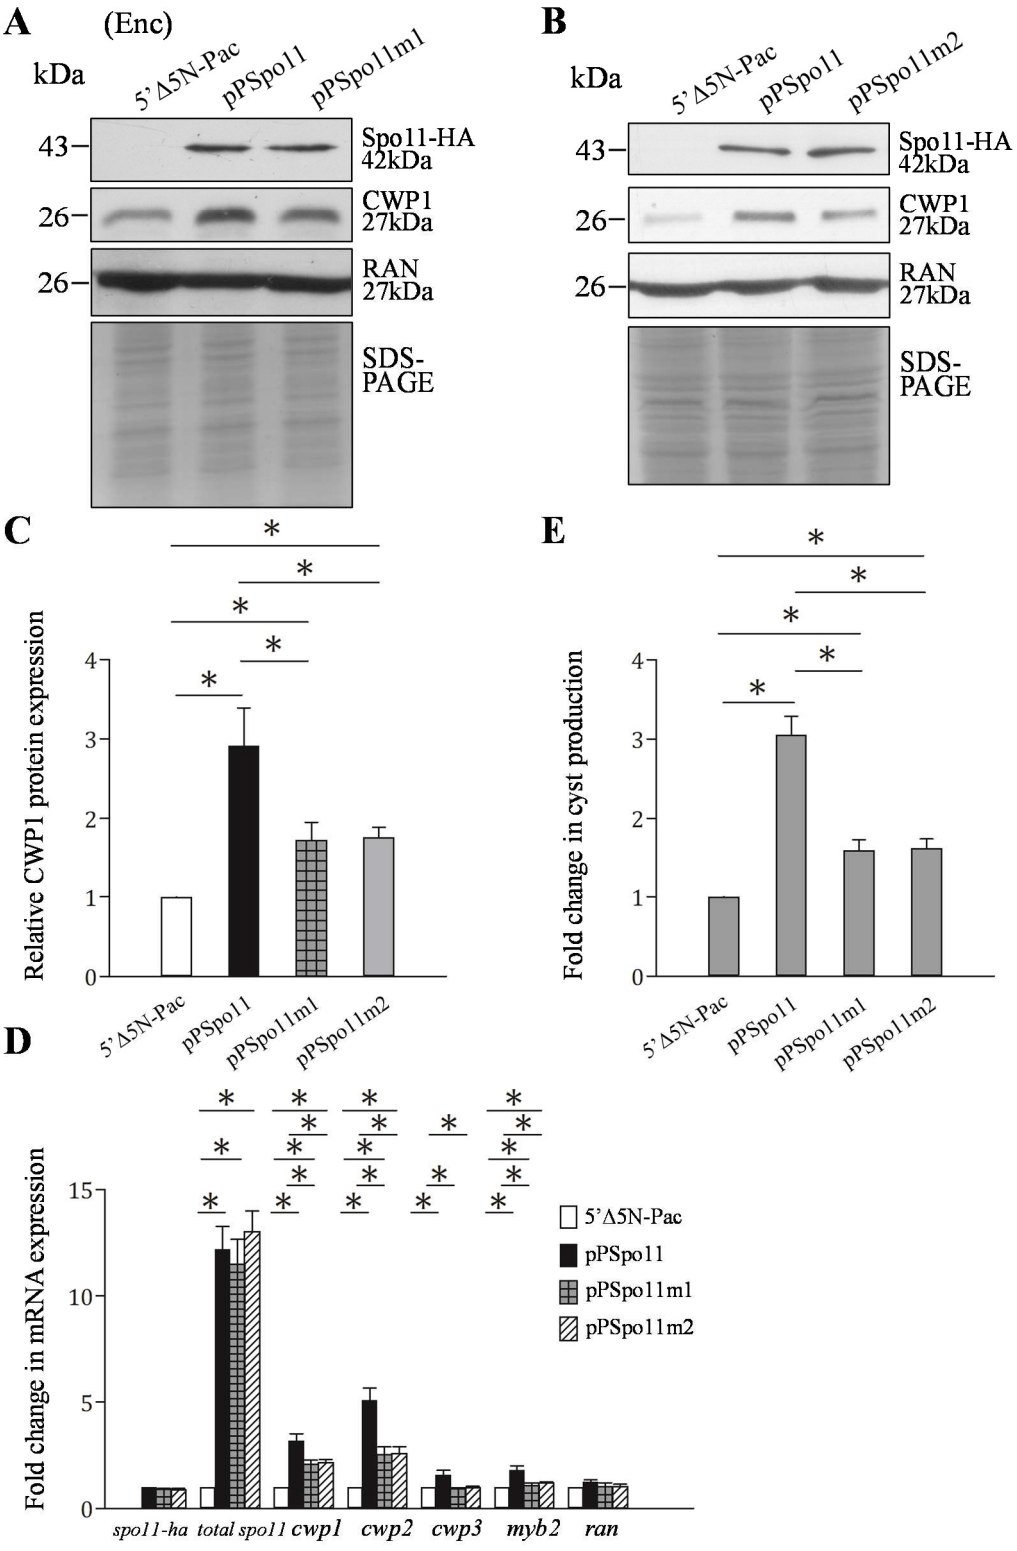

**Fig.S4. Increased expression of the *cwp1-3* and *myb2* genes in the Spo11-expressing cell line during encystation.** (A) Spo11 expression increased the CWP1 level during encystation. The 5'Δ5N-Pac, pPSpo11, and pPSpo11m2 stable transfectants were incubated in encystation medium for 24h and then subjected to SDS-PAGE and Western blot. The blot was probed by anti-HA, anti-CWP3, and anti-Ran antibodies, respectively. The intensity of bands from three Western blot assays was quantified as described in Fig. 3A. (B) Quantitative real-time PCR assays of transcript expression in the Spo11- and Spo11m2- expressing cell lines during encystation. Real-time PCR was performed using primers for genes indicated in the figure. The ratio of mRNA levels in the pPSpo11 or pPSpo11m2 cell line to levels in the 5'Δ5NPac cell line was quantified as described in Fig. 3C. (D) Expression of Spo11 induced cyst generation during encystation. Cyst number was counted from the 5'Δ5N-Pac, pPSpo11, and pPSpo11m2 stable transfectants cultured in encystation medium as described in "Materials and Methods" and Fig. 3D.

Figure S5

**A**

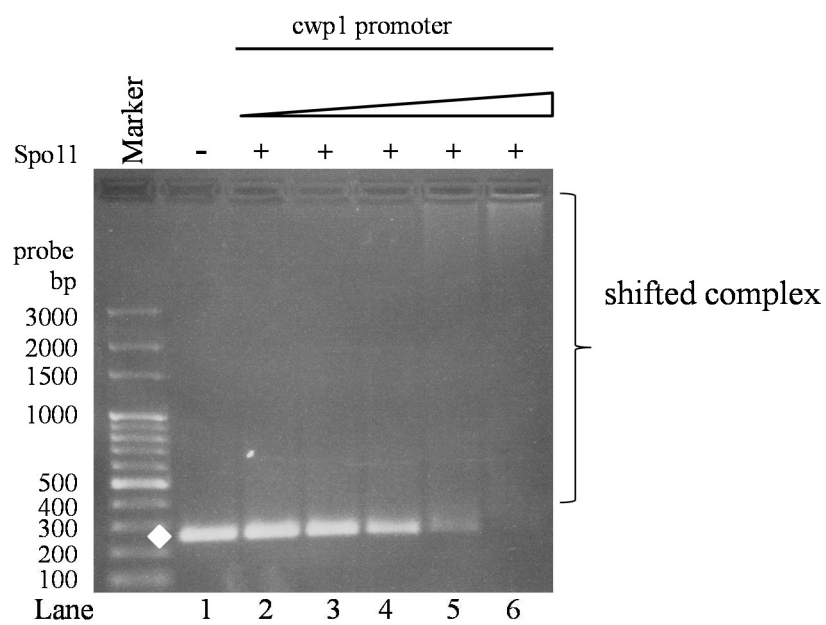

**B**

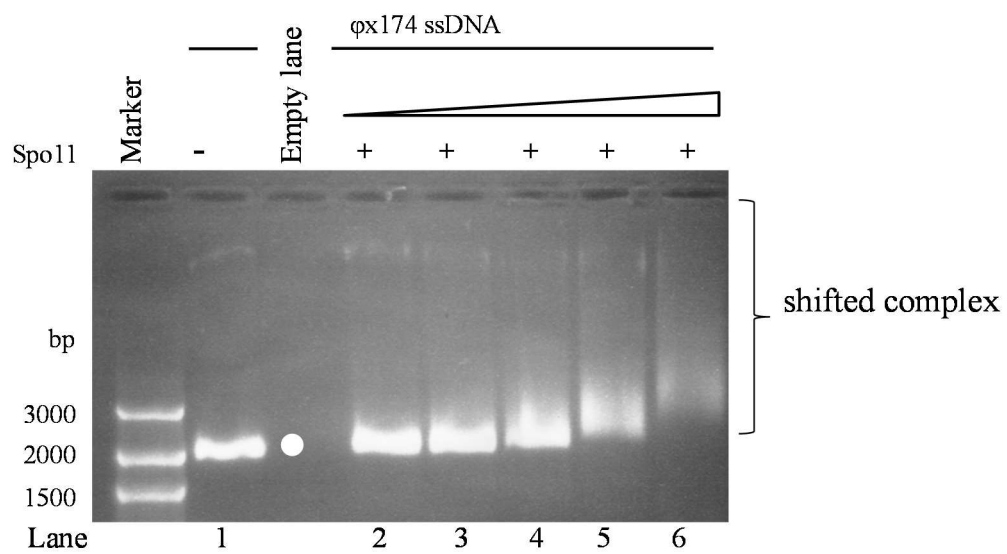

**Fig. S5. Spo11 can bind to *cwp1* promoter and ssDNA. (A) Detection of DNA binding ability of Spo11 with *cwp1* promoter probe.** Purified Spo11 and the linear *cwp1* promoter probe were used in electrophoretic mobility shift assays. Binding reaction mixtures contained the components indicated above the lanes. The probe (300ng/rxn) was incubated with 26, 53, 105, 210, and 420ng purified Spo11 (lanes 2 to 6, respectively). The white diamond indicates linear DNA. (B) Detection of DNA binding ability of Spo11 with ssDNA probe. Purified Spo11 and the  $\phi$ x174 ssDNA probe were used in electrophoretic mobility shift assays. Binding reaction mixtures contained the components indicated above the lanes. The probe (300ng/rxn) was incubated with 26, 53, 105, 210, and 420ng purified Spo11 (lanes 2 to 6, respectively). The white circle indicates ssDNA.

—

Figure S6

ATGGGCACCGAGTACAAGCCCACGGTGCGCCTCGCCACCCGCGACGACGTCCCCGGGGCCG  
TACGCACCCTCGCCGCCGCGTTCGCCGACTACCCCGCCACGCGCCACACCGTCGACCCGGA  
CCGCCACATCGAGCGGGTCACCGAGCTGCAAGAACTCTTCCTCACGCGCGTCGGGCTCGAC  
ATCGGCAAGGTGTGGGTTCGCGGACGACGGCGCCGCGGTGGCGGTCTGGACCACGCCGGAGA  
GCGTCGAAGCGGGGGCGGTGTTCGCCGAGATCGGCCCCGCGCATGGCCGAGTTGAGCGGTTC  
CCGGCTGGCCGCGCAGCAACAGATGGAAGGCCTCCTGGCGCCGCACCGGCCCAAGGAGCCC  
GCGTGTTTCTGGCCACCGTCGGCGTCTCGCCGACCACCAGGGCAAGGGTCTGGGCAGCG  
CCGTCGTGCTCCCCGGAGTGGAGGCGGCCGAGCGCGCCGGGTGCCCGCCTTCCTGGAGAC  
CTCCGCGCCCCGCAACCTCCCCTTCTACGAGCGGCTCGGCTTCACCGTCACCGCCGACGTC  
GAGTGCCCG**AAGGACCGCGCGACCTGGT**GCATGACCCGCAAGCCCGGTGCCCTCGAGTGA  
cggtggtgcttggtcagatttgtgcaattgggaactctgcaagtggcgtgtttaacgacct  
tttgtcagggattaacgtctctgtacccttcttgtagtctatgctcttctacgggctgctt  
ctatTTTTatgggtactgccttccgttcacaagctattcgtccaccgtgcccgcgatgtag  
gctTTTTcttctatctgggatcctagatatcacagcaaacagccttgccataatgtcatt  
tgtttacacatctgtcggcgccgttctactcattctttgtctctctacgccttctccatg  
atcctctcgttgatcattacgaaagcgcgcttctcgtagtgcaagtgatgttttcctgct  
tcgctacggggttcgcatattgtttgtcattcttgacactatgggcgacgagtcaaaaca  
cagggtgcttgagatttgcttgctgtagcctcagcctttatctacgggctcacatccgtg  
ataaatgagttcgtcataggctcatatacacctgtccaattccttgccaggctcagcatcg  
gcgccttttctctcgcgcttattctgtttctctgtttcgaggcagacaacatccagatttt  
ggcgacccttcggccgtggtggtatatcataggatatctcgtcagcctcgtggtgatgtac  
agtgttctcccgtagtgattaagtagcgcggtgcagttgttttcaatatcagtcctcataa  
gttgtaatgtttatggaatgtttgcgtccttgatcatattcaagtac**aaatatatcccttg**  
**gattgca**

**Fig. S6. Replacement of the *spo11* gene with the *pac* gene in the Spo11td cell line confirmed by PCR and sequencing.** Genomic DNA was isolated from the Spo11td and control cell lines cultured in growth medium. PCR was performed using primers specific for *pac* (PCR2 in Fig. 7A), which are PCR2F for bold region 1 and PCR2R for bold region 2, to verify the integration of the *pac* gene into the correct region in genomic DNA. The sequence results obtained from the PCR2 product are shown as underlined letters. Capital letters indicate the coding sequence for the *pac* gene, which starts at ATG and stops at TGA. This indicates the replacement of the *spo11* gene with the *pac* gene. The region used to clone the *spo11* 3' region into the pSpo11td plasmid for HR is shown in red, which is also between the sequence of spo113XF and spo113KR. The underlined and lower case letters, which are downstream and outside of the red region of spo113XF and spo113KR, indicate that HR occurred in the sequence of spo11 3' region and that the *pac* gene was integrated in the genomic DNA.

Figure S7

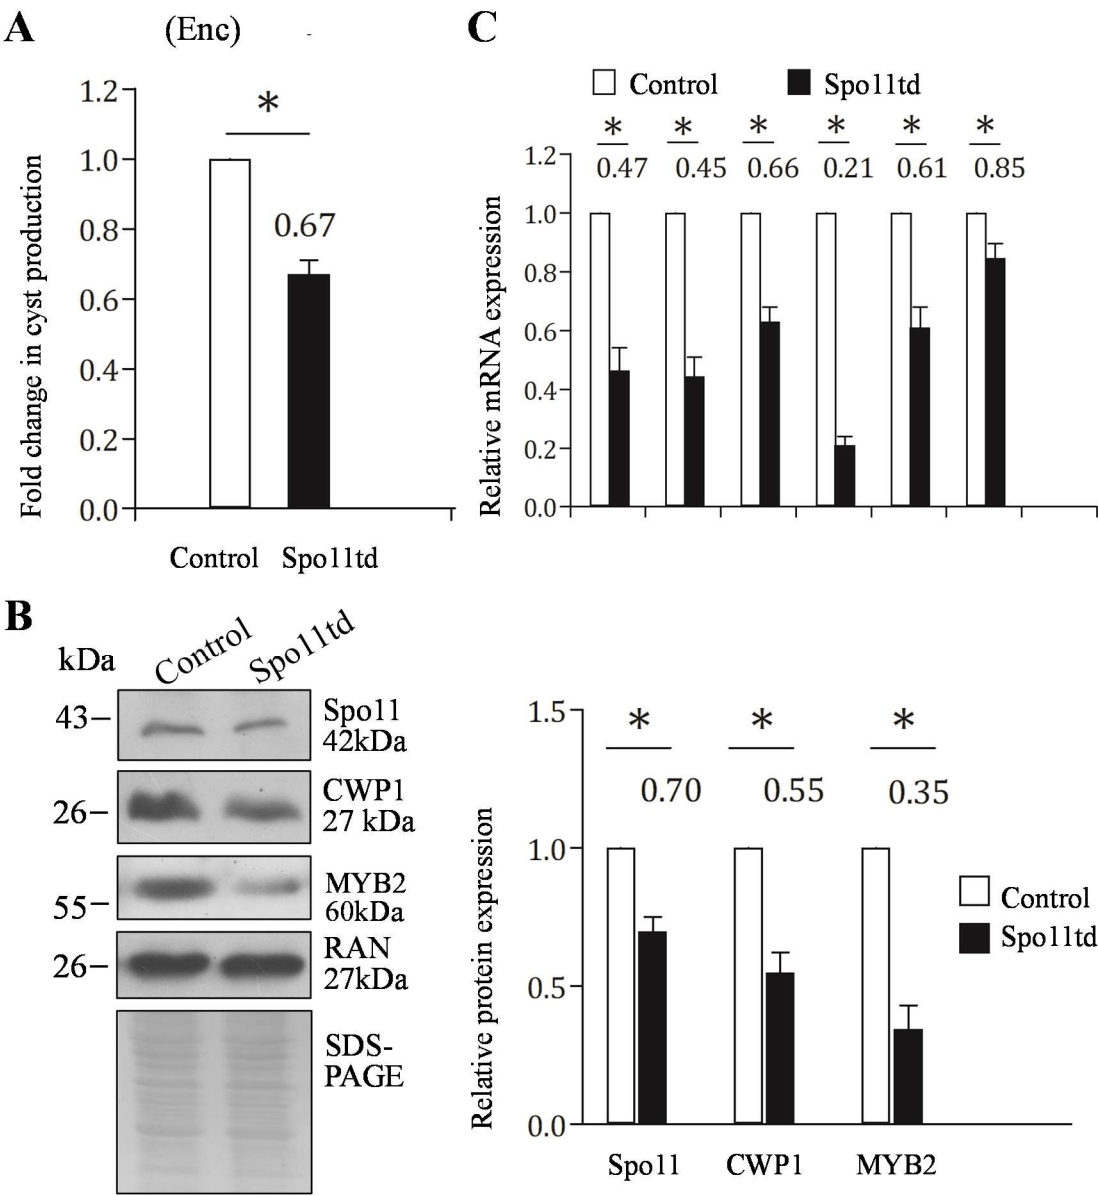

**Fig. S7. Decrease in expression of *cwp1-3*, and *myb2* by targeted disruption of the *spo11* gene during encystation.** (A) Cyst generation decreased by targeted disruption of the *spo11* gene in the Spo11td cell line during encystation. The control and Spo11td cell lines were cultured in encystation medium for 24h (Enc) and then subjected to cyst count as described under “Materials and Methods” and Fig. 3D. (B) Targeted disruption of the *spo11* gene decreased the CWP1 and MYB2 levels in the Spo11td cell line during encystation. The control and Spo11td cell lines were cultured in encystation medium for 24h and then subjected to SDS-PAGE and Western blot analysis as described in Fig. 3A. The blot was probed with anti-Spo11, anti-CWP1, anti-MYB2, and anti-RAN antibodies, respectively. The intensity of bands from three Western blot assays was quantified as described in Fig. 3A. (C) Decrease in expression of *cwp1-3*, and *myb2* by targeted disruption of the *spo11* gene in the Spo11td cell line during encystation. The control and Spo11td cell lines were cultured in encystation medium for 24h and then subjected to quantitative real-time RT-PCR analysis using primers specific for *spo11*, *cwp1*, *cwp2*, *cwp3*, *myb2*, *ran*, and 18S ribosomal RNA genes, respectively, as described in Fig. 2A.

Figure S8

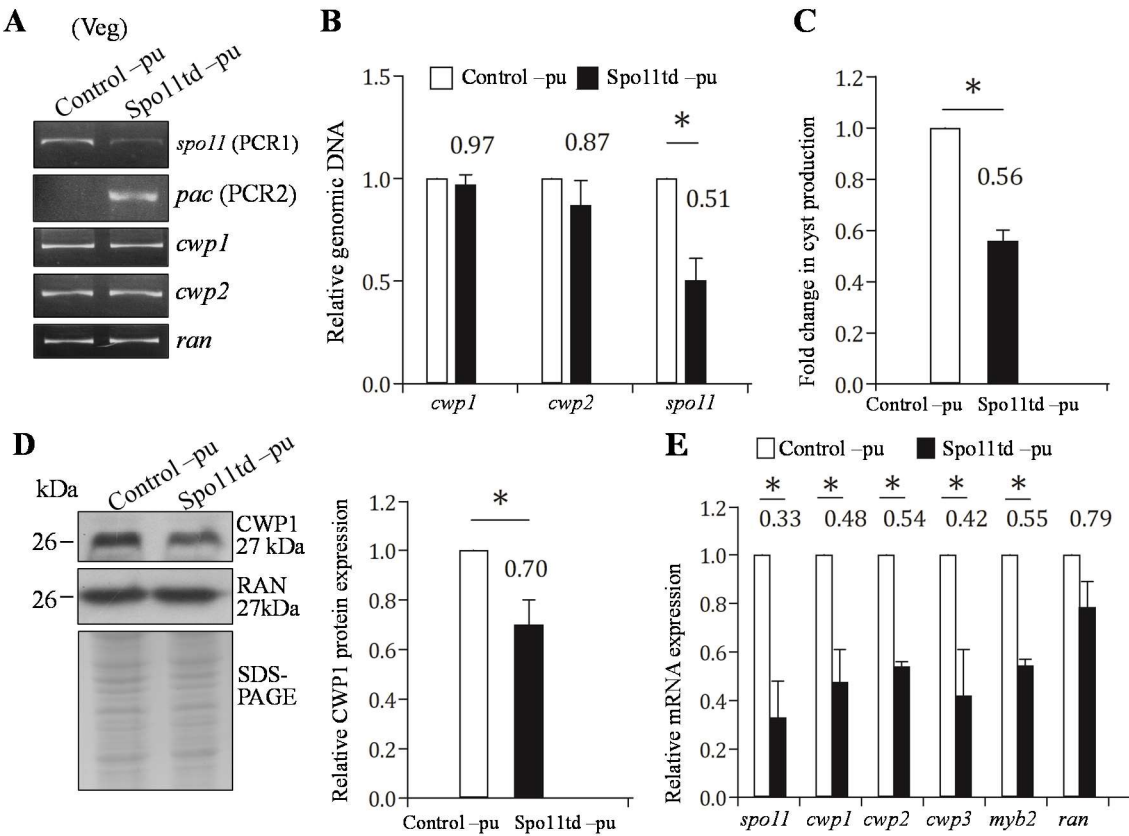

**Fig. S8. Decrease in expression of *cwp1-3* and *myb2* by targeted disruption of the *spo11* gene after the removal of puromycin during vegetative growth.** (A) Partial replacement of the *spo11* gene with the *pac* gene in the Spo11<sup>-pu</sup> cell line confirmed by PCR. Puromycin was removed from the Spo11<sup>td</sup> and control cell lines to obtain the Spo11<sup>td</sup>-pu and control -pu cell lines, respectively. Genomic DNA was isolated from the Spo11<sup>td</sup>-pu and control -pu cell lines cultured in growth medium (vegetative growth, Veg). PCR was performed using primers specific for *spo11* (PCR1), *pac* (PCR2), *cwp1*, *cwp2*, and *ran* genes, respectively, as described in Fig. 8B. (B) Partial disruption of the *spo11* gene in the Spo11<sup>td</sup>-pu cell line confirmed by real-time PCR. Real-time PCR was performed using genomic DNA and primers specific for *spo11*, *cwp1*, *cwp2*, and *ran* genes, respectively, as described in Fig. 8C. (C) Cyst generation decreased by targeted disruption of the *spo11* gene in the Spo11<sup>td</sup>-pu cell line during vegetative growth. The control -pu and Spo11<sup>td</sup>-pu cell lines were cultured in growth medium and then subjected to cyst count as described under “Materials and Methods” and Fig. 3D. (D) Targeted disruption of the *spo11* gene decreased the CWP1 level in the Spo11<sup>td</sup>-pu cell line during vegetative growth. The control -pu and Spo11<sup>td</sup>-pu cell lines were cultured in growth medium and then subjected to SDS-PAGE and Western blot analysis as described in Fig. 3A. The blot was probed with anti-CWP1, and anti-RAN antibodies, respectively. The intensity of bands from three Western blot assays was quantified as described in Fig. 3A. (E) Decrease in expression of *cwp1-3* and *myb2* by targeted disruption of the *spo11* gene in the Spo11<sup>td</sup>-pu cell line during vegetative growth. The control -pu and Spo11<sup>td</sup>-pu cell lines were cultured in growth medium and then subjected to quantitative real-time RTPCR analysis using primers specific for *spo11*, *cwp1*, *cwp2*, *cwp3*, *myb2*, *ran*, and 18S ribosomal RNA genes, respectively, as described in Fig. 2A.

Figure S9

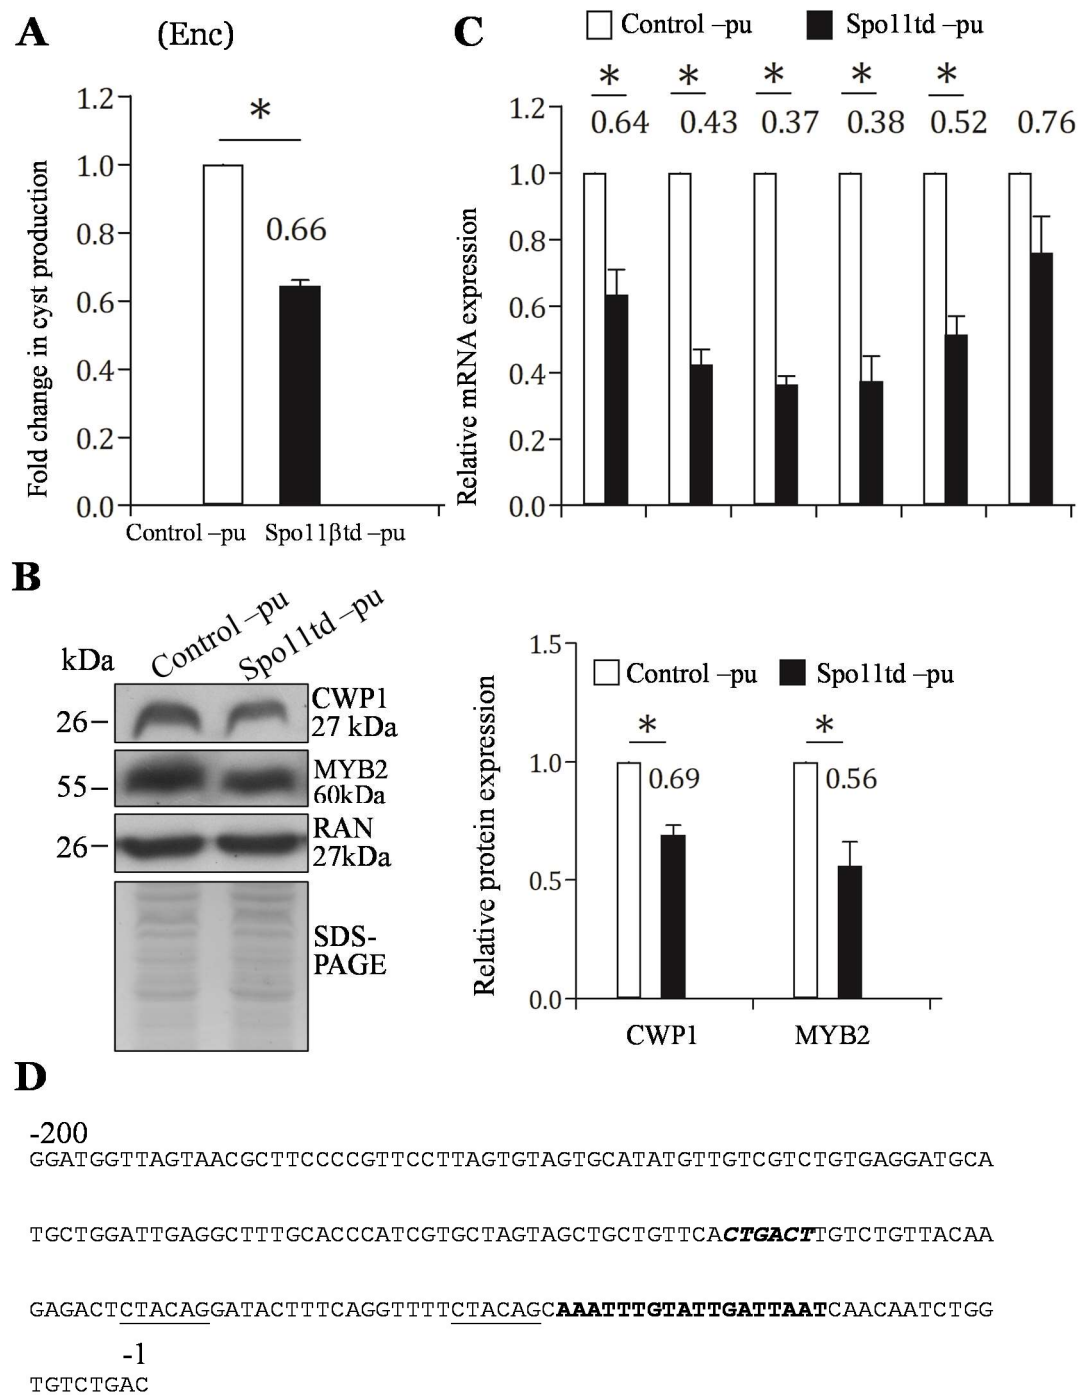

**Fig. S9. Decrease in expression of *cwp1* and *cwp2* by targeted disruption of the *spo11* gene after the removal of puromycin during encystation.** (A) Cyst generation decreased by targeted disruption of the *spo11* gene in the Spo11td –pu cell line during encystation. The control –pu and Spo11td –pu cell lines were cultured in encystation medium for 24h (Enc) and then subjected to cyst count as described under “Materials and Methods”, as described in Fig. 3D. (B) Targeted disruption of the *spo11* gene decreased the CWP1 level in the Spo11td –pu cell line during encystation. The control –pu and Spo11td –pu cell lines were cultured in encystation medium for 24h and then subjected to SDS-PAGE and Western blot analysis as described in Fig. 3A. The blot was probed with anti-CWP1, and anti-RAN antibodies, respectively. The intensity of bands from three Western blot assays was quantified as described in Fig. 3A. (C) Decrease in expression of *cwp1* -3 and *myb2* by targeted disruption of the *spo11* gene in the Spo11td –pu cell line during encystation. The control –pu and Spo11td –pu cell lines were cultured in encystation medium for 24h and then subjected to quantitative real-time RT-PCR analysis using primers specific for *spo11*, *cwp1*, *cwp2*, *cwp3*, *myb2*, *ran*, and 18S ribosomal RNA genes, respectively, as described in Fig. 2A. (D) The WRKY and MYB2 binding sites in the *Spo11* promoter. The 200-bp 5’ untranslated region of the *spo11* promoter is shown. The AT-rich promoter element is in bold. The underlined sequence, CTGACT and CTACAG, is the WRKY and MYB2 binding sequences, respectively.

**Table S2. Oligonucleotides used for construction of plasmids and PCR.**

| Name           | Sequence (5'--->3')              |
|----------------|----------------------------------|
| spo11F (PCR1F) | CACCATGTGCGATATTGATAAG           |
| spo11R (PCR1R) | GGACGAATTTGCGCGAGC               |
| HAR            | AGCGTAATCTGGAACATCGTATGGGTA      |
| cwp1F          | ATGATGCTCGCTCTCCTT               |
| cwp1R          | TCAAGGCGGGGTGAGGCA               |
| cwp2F          | ATGATCGCAGCCCTTGTTCTA            |
| cwp2R          | CCTTCTGCGGACAATAGGCTT            |
| cwp3F          | ATGTTTTCTCTGCTTCTTCT             |
| cwp3R          | TCTGTAGTAGGGCGGCTGTA             |
| myb2F          | ATGTTACCGGTACCTTCTCAGC           |
| myb2R          | GGGTAGCTTCTCACGGGGAAG            |
| ranF           | ATGTCTGACCCAATCAGC               |
| ranR           | TCAATCATCGTCGGGAAG               |
| spo11realF     | CGCAGAATTTTGCTTCGGATA            |
| spo11realR     | GCAGCTGCCCGATAATGC               |
| cwp1realF      | AACGCTCTCACAGGCTCCAT             |
| cwp1realR      | AGGTGGAGCTCCTTGAGAAATTG          |
| cwp2realF      | TAGGCTGCTTCCCACCTTTGAG           |
| cwp2realR      | CGGGCCCGCAAGGT                   |
| cwp3realF      | GCAAATTGGATGCCAAACAA             |
| cwp3realR      | GACTCCGATCCAGTCGCAGTA            |
| myb2realF      | TCCCTAATGACGCCAAACG              |
| myb2realR      | AGCACGCAGAGGCCAAGT               |
| ranrealF       | TCGTCCTCGTCGGAAACAA              |
| ranrealR       | AACTGTCTGGGTGCGGATCT             |
| 18SrealF       | AAGACCGCCTCTGTCAATCAA            |
| 18SrealR       | GTTTACGGCCGGAATACG               |
| spo11NF        | GGCCGGCTAGCTATTGAAGAACGACATCAAGA |
| spo11MR        | GGCCGACGCGTGGACGAATTTGCGCGAGCACC |

|             |                                                                                                                                                                                                                                                                                                                                                                                                                                                                                                                                                                                        |
|-------------|----------------------------------------------------------------------------------------------------------------------------------------------------------------------------------------------------------------------------------------------------------------------------------------------------------------------------------------------------------------------------------------------------------------------------------------------------------------------------------------------------------------------------------------------------------------------------------------|
| spo11m1F    | AACATTTCGCAGTTTGTATCATACTGCTCCTTCGCTATAT                                                                                                                                                                                                                                                                                                                                                                                                                                                                                                                                               |
| spo11m1R    | ATATAGCGAAGGAGCAGTATGATACAAACTGCGAATGTT                                                                                                                                                                                                                                                                                                                                                                                                                                                                                                                                                |
| spo11m2F    | GTGATCACTGGCAAAGCATACCCCGATGCGGCGACAGCCGCCCTGGTTTCTTTT                                                                                                                                                                                                                                                                                                                                                                                                                                                                                                                                 |
| spo11m2R    | AAAAGAAACCAGGGCGGCTGTCGCCGCATCGGGGTATGCTTTGCCAGTGATCAC                                                                                                                                                                                                                                                                                                                                                                                                                                                                                                                                 |
| spo115HF    | GGCCGAAGCTTTGTCATTTGCAATTGTGTTAG                                                                                                                                                                                                                                                                                                                                                                                                                                                                                                                                                       |
| spo115NR    | GGCCGCCATGGGTCAGACACCAGATTGTTGAT                                                                                                                                                                                                                                                                                                                                                                                                                                                                                                                                                       |
| spo113XF    | GGCCGCTCGAGTGACGGTGGTGCTTGGTCAGATTT                                                                                                                                                                                                                                                                                                                                                                                                                                                                                                                                                    |
| spo113KR    | GGCCGGGTACCCCGTACTTAATCACTAACGGG                                                                                                                                                                                                                                                                                                                                                                                                                                                                                                                                                       |
| spo11-guide | <p>GAGAGCGGGTACCCTAGCTTATTGAAAAAGCGAGAGGCCATTGAGATGACTCGCCT<br/> GATTGCAATAGCAAACAGTGTCTATAGTCTAATTGTGGACAACAGAGGGCTTATTG<br/> CAACGTTGATGACCAAGTTCAACAAGGGCGTCGCCTCCTATGAGCAGGTCATTTCGG<br/> AATTTTCGACGACCGGTAGCGTCCCCAGAGTAAACCATTTTAAATTGAAATAGGCGG<br/> TTGGAAATAAAAGCGCGCC<b>TACACTGCTCCTTCGCTATA</b>GTTTTAGAGCTAGAAAT<br/> AGCAAGTTAAAATAAGGCTAGTCCGTTATCAACTTGAAAAAGTGGCACCGAGTCGG<br/> TGCTTTTTTTGAATTCGAGAGCG, underlined region is U6 promoter, bold region<br/> is for annealing, underlined and bold region is upstream 3nt of PAM, other<br/> region is scaffold RNA</p> |
| PCR2F       | AAGGACCGCGCGACCTGG                                                                                                                                                                                                                                                                                                                                                                                                                                                                                                                                                                     |
| PCR2R       | TGGACAAAGAAAGTCTCGGGC                                                                                                                                                                                                                                                                                                                                                                                                                                                                                                                                                                  |
| spo115F     | TAGTGTAGTGCATATGTTGTC                                                                                                                                                                                                                                                                                                                                                                                                                                                                                                                                                                  |
| spo115R     | GTAGAGTCTCTTGTAACAGAC                                                                                                                                                                                                                                                                                                                                                                                                                                                                                                                                                                  |
| 18S5F       | CCAAAAAAGTGTGGTGCAGG                                                                                                                                                                                                                                                                                                                                                                                                                                                                                                                                                                   |
| 18S5R       | GCCGGGCGCGGGCGCCGCGG                                                                                                                                                                                                                                                                                                                                                                                                                                                                                                                                                                   |
| cwp15F      | CAACGGCTTACTAAATCATCTCTTG                                                                                                                                                                                                                                                                                                                                                                                                                                                                                                                                                              |
| cwp15R      | TTCTGTGTTTCTTGATCTGAGAGTTGT                                                                                                                                                                                                                                                                                                                                                                                                                                                                                                                                                            |
| cwp25F      | CACTTTGATGAGAGCATGGG                                                                                                                                                                                                                                                                                                                                                                                                                                                                                                                                                                   |
| cwp25R      | TTAGTTCATATCTTAAGTTA                                                                                                                                                                                                                                                                                                                                                                                                                                                                                                                                                                   |
| cwp35F      | TGGGGGAGATAGGAGAATAC                                                                                                                                                                                                                                                                                                                                                                                                                                                                                                                                                                   |
| cwp35R      | ATCAGTAGTAACTTATTTTTTGGGAAAGAC                                                                                                                                                                                                                                                                                                                                                                                                                                                                                                                                                         |
| myb25F      | TGGCTATGTATTTTTTCTTCTCTACAGCT                                                                                                                                                                                                                                                                                                                                                                                                                                                                                                                                                          |
| myb25R      | TAGCAGTACAGAGTAATTATTATTTAGTA                                                                                                                                                                                                                                                                                                                                                                                                                                                                                                                                                          |
| U65F        | TTGAGATGACTCGCCTGATTG                                                                                                                                                                                                                                                                                                                                                                                                                                                                                                                                                                  |
| U65R        | GAAATTCCGAATGACCTGCTC                                                                                                                                                                                                                                                                                                                                                                                                                                                                                                                                                                  |
