# Supplementary material for: A Novel Spo11 Homologue Functions as a Positive Regulator in Cyst Differentiation in Giardia lamblia
Source: Int J Mol Sci. 2021 Nov 2;22(21):11902. doi: 10.3390/ijms222111902 (PMC8584520; doi:10.3390/ijms222111902)
Supplement: Supplementary file 1 [file ijms-22-11902-s001.zip › Table S1.xlsx]

## Sheet: 15729_5pac5n2013.7.24_2FCfilter
gene_id	gene	locus	description	sample_1	sample_2	value_1	value_2	ratio(15279/5pac_5n_20130724)	log2(ratio)	p_value	q_value	significant
GL50803_100283	GL50803_100283	ctg02_67:38942-39173	hypothetical protein	Spo11	5’D5N-Pac	413.321	162.899	2.53728	1.34328	0.01975	0.999159	no
GL50803_100464	GL50803_100464	ctg02_4:108908-109142	hypothetical protein	Spo11	5’D5N-Pac	113.238	272.581	0.415429	-1.26733	0.04475	0.999159	no
GL50803_100906	GL50803_100906	ctg02_48:3782-22423	Dynein heavy chain, putative	Spo11	5’D5N-Pac	53.7098	25.5025	2.10606	1.07455	0.03095	0.999159	no
GL50803_101138	GL50803_101138	ctg02_15:185805-201297	Dynein heavy chain	Spo11	5’D5N-Pac	44.7924	19.0627	2.34974	1.2325	0.00625	0.675706	no
GL50803_101291	GL50803_101291	ctg02_14:50908-52337	Beta tubulin	Spo11	5’D5N-Pac	29.191	9.6531	3.024	1.59646	0.0041	0.581406	no
GL50803_101339	GL50803_101339	ctg02_18:65308-65956	FKBP-type peptidyl-prolyl cis-trans isomerase	Spo11	5’D5N-Pac	233.872	492.01	0.47534	-1.07297	0.00465	0.607052	no
GL50803_10238	GL50803_10238	ctg02_48:59233-62308	hypothetical protein	Spo11	5’D5N-Pac	298.864	73.9414	4.0419	2.01503	0.00065	0.223997	no
GL50803_10255	GL50803_10255	ctg02_4:132108-133293	Translation initiation factor eIF-4A, putative	Spo11	5’D5N-Pac	502.107	1186.6	0.423148	-1.24077	0.0244	0.999159	no
GL50803_103373	GL50803_103373	ctg02_68:31731-32898	Alpha-7.1 giardin	Spo11	5’D5N-Pac	11.5966	28.4678	0.407358	-1.29563	0.01805	0.9967	no
GL50803_10367	GL50803_10367	ctg02_2:603087-604702	Ribosomal protein S24	Spo11	5’D5N-Pac	820.412	2242.87	0.365787	-1.45093	0.0007	0.234335	no
GL50803_103916	GL50803_103916	ctg02_44:79592-80138	VSP, putative	Spo11	5’D5N-Pac	75.4474	32.2766	2.33753	1.22498	0.02695	0.999159	no
GL50803_103992	GL50803_103992	ctg02_2:642928-644812	VSP	Spo11	5’D5N-Pac	9176.54	146.628	62.5838	5.96772	0.0055	0.638831	no
GL50803_104063	GL50803_104063	ctg02_25:8744-9110	hypothetical protein	Spo11	5’D5N-Pac	215.314	80.6543	2.66959	1.41662	0.0095	0.789777	no
GL50803_104250	GL50803_104250	ctg02_2:158123-158495	hypothetical protein	Spo11	5’D5N-Pac	108.811	229.132	0.474883	-1.07435	0.0351	0.999159	no
GL50803_10450	GL50803_10450	ctg02_4:235718-236048	FKBP-type peptidyl-prolyl cis-trans isomerase	Spo11	5’D5N-Pac	140.532	365.358	0.384642	-1.37841	0.0071	0.713685	no
GL50803_10573	GL50803_10573	ctg02_22:36477-37587	Protein 21.1	Spo11	5’D5N-Pac	42.2168	91.7444	0.460157	-1.1198	0.01295	0.893855	no
GL50803_105782	GL50803_105782	ctg02_81:2486-3247	Hypothetical protein	Spo11	5’D5N-Pac	206.985	26.9822	7.67117	2.93945	5e-05	0.0366148	yes
GL50803_105788	GL50803_105788	ctg02_131:544-727	hypothetical protein	Spo11	5’D5N-Pac	1175.75	41.4173	28.3879	4.8272	0.0031	0.507112	no
GL50803_106496	GL50803_106496	ctg02_1:154547-156445	hypothetical protein	Spo11	5’D5N-Pac	261.668	108.56	2.41035	1.26924	0.00655	0.692564	no
GL50803_106673	GL50803_106673	ctg02_6:104637-106414	hypothetical protein	Spo11	5’D5N-Pac	256.717	83.2472	3.08379	1.62471	0.0441	0.999159	no
GL50803_10680	GL50803_10680	ctg02_6:271400-272732	hypothetical protein	Spo11	5’D5N-Pac	127.497	57.8511	2.20388	1.14005	0.00405	0.578693	no
GL50803_10822	GL50803_10822	ctg02_4:169713-170742	WD-40 repeat protein family	Spo11	5’D5N-Pac	305.058	694.377	0.439326	-1.18664	0.01005	0.806185	no
GL50803_10840	GL50803_10840	ctg02_4:308892-309198	DNA-directed RNA polymerases I and III 16 kDa polypeptide	Spo11	5’D5N-Pac	141.187	360.494	0.391649	-1.35237	0.0134	0.898911	no
GL50803_10850	GL50803_10850	ctg02_4:296917-297304	hypothetical protein	Spo11	5’D5N-Pac	35.3258	116.457	0.303338	-1.721	0.0046	0.605585	no
GL50803_11149	GL50803_11149	ctg02_49:54077-54950	hypothetical protein	Spo11	5’D5N-Pac	494.71	210.512	2.35003	1.23268	0.0072	0.7172	no
GL50803_111874	GL50803_111874	ctg02_38:740-3062	VSP	Spo11	5’D5N-Pac	114.062	41.8067	2.72832	1.44801	0.0045	0.600431	no
GL50803_111933	GL50803_111933	ctg02_49:6683-8909	VSP	Spo11	5’D5N-Pac	7.48842	2.26773	3.30217	1.72341	0.00645	0.689771	no
GL50803_112009	GL50803_112009	ctg02_21:130058-131252	VSP	Spo11	5’D5N-Pac	95.3408	42.86	2.22447	1.15346	0.009	0.768312	no
GL50803_112135	GL50803_112135	ctg02_17:120869-124304	High cysteine membrane protein VSP-like	Spo11	5’D5N-Pac	91.9957	33.0695	2.78189	1.47607	5e-05	0.0366148	yes
GL50803_112305	GL50803_112305	ctg02_53:37296-39974	High cysteine membrane protein VSP-like	Spo11	5’D5N-Pac	14.5294	6.71025	2.16525	1.11454	0.0432	0.999159	no
GL50803_11247	GL50803_11247	ctg02_46:69147-70377	Ribosomal protein L13a	Spo11	5’D5N-Pac	753.478	1631.4	0.46186	-1.11447	0.03485	0.999159	no
GL50803_112518	GL50803_112518	ctg02_7:246611-248705	Kinase, NEK	Spo11	5’D5N-Pac	394.612	161.376	2.4453	1.29001	0.01065	0.822093	no
GL50803_112519	GL50803_112519	ctg02_7:248825-249380	hypothetical protein	Spo11	5’D5N-Pac	6.68173	21.7227	0.307592	-1.70091	0.0161	0.965217	no
GL50803_112692	GL50803_112692	ctg02_7:6599-12071	ABC-type multidrug transport system, ATPase component	Spo11	5’D5N-Pac	2.28988	5.75898	0.397619	-1.33054	0.01715	0.982603	no
GL50803_112870	GL50803_112870	ctg02_2:430140-430506	hypothetical protein	Spo11	5’D5N-Pac	62.2481	225.797	0.275682	-1.85892	0.00175	0.389631	no
GL50803_112885	GL50803_112885	ctg02_59:8370-8913	Adenine phosphoribosyltransferase	Spo11	5’D5N-Pac	236.891	585.458	0.404625	-1.30534	0.00095	0.277406	no
GL50803_112893	GL50803_112893	ctg02_59:26585-27305	hypothetical protein	Spo11	5’D5N-Pac	81.7327	185.771	0.439965	-1.18454	0.00625	0.675706	no
GL50803_112932	GL50803_112932	ctg02_57:14669-15527	hypothetical protein	Spo11	5’D5N-Pac	104.923	216.886	0.48377	-1.04761	0.0095	0.789776	no
GL50803_11301	GL50803_11301	ctg02_26:64203-65440	Nucleoside diphosphate kinase	Spo11	5’D5N-Pac	175.05	519.315	0.337079	-1.56884	0.00285	0.488823	no
GL50803_113093	GL50803_113093	ctg02_32:111705-113661	VSP	Spo11	5’D5N-Pac	9.84011	2.98072	3.30125	1.72301	0.00755	0.729955	no
GL50803_11311	GL50803_11311	ctg02_26:51750-52854	Kinase, NEK	Spo11	5’D5N-Pac	134.728	287.153	0.469185	-1.09177	0.0035	0.53606	no
GL50803_113130	GL50803_113130	ctg02_4:106719-108228	hypothetical protein	Spo11	5’D5N-Pac	30.5258	69.9299	0.43652	-1.19588	0.0049	0.621091	no
GL50803_113284	GL50803_113284	ctg02_29:52250-53009	hypothetical protein	Spo11	5’D5N-Pac	1.82981	7.68323	0.238156	-2.07002	0.02405	0.999159	no
GL50803_113304	GL50803_113304	ctg02_29:113059-114970	VSP	Spo11	5’D5N-Pac	597.931	110.8	5.39649	2.43202	0.00015	0.0854717	no
GL50803_113357	GL50803_113357	ctg02_32:64913-66776	VSP	Spo11	5’D5N-Pac	1.89913	0.455555	4.16883	2.05964	0.03185	0.999159	no
GL50803_113450	GL50803_113450	ctg02_9:80248-82447	VSP with INR	Spo11	5’D5N-Pac	52.4798	23.0085	2.28089	1.1896	0.0042	0.588465	no
GL50803_11363	GL50803_11363	ctg02_15:30849-31818	hypothetical protein	Spo11	5’D5N-Pac	70.3476	15.5881	4.5129	2.17406	0.00045	0.175022	no
GL50803_114065	GL50803_114065	ctg02_21:127598-129419	VSP	Spo11	5’D5N-Pac	25.8756	12.4137	2.08444	1.05966	0.0356	0.999159	no
GL50803_114121	GL50803_114121	ctg02_64:998-2588	VSP	Spo11	5’D5N-Pac	19.463	7.52235	2.58736	1.37148	0.0164	0.970172	no
GL50803_114122	GL50803_114122	ctg02_99:127-2148	VSP	Spo11	5’D5N-Pac	203.91	45.4742	4.48408	2.16481	5e-05	0.0366148	yes
GL50803_114161	GL50803_114161	ctg02_20:35317-36988	High cysteine protein	Spo11	5’D5N-Pac	20.7481	7.60376	2.72866	1.44819	0.0086	0.760243	no
GL50803_114277	GL50803_114277	ctg02_12:4842-9534	VSP	Spo11	5’D5N-Pac	48.3782	16.3851	2.95257	1.56197	0.03165	0.999159	no
GL50803_11443	GL50803_11443	ctg02_10:252877-253183	hypothetical protein	Spo11	5’D5N-Pac	119.993	33.3851	3.59421	1.84567	0.0054	0.637887	no
GL50803_114623	GL50803_114623	ctg02_55:47758-49027	hypothetical protein	Spo11	5’D5N-Pac	236.977	484.902	0.488711	-1.03295	0.00825	0.748239	no
GL50803_115066	GL50803_115066	ctg02_25:152619-156123	High cysteine membrane protein VSP-like	Spo11	5’D5N-Pac	229.401	37.5319	6.11216	2.61168	5e-05	0.0366148	yes
GL50803_115085	GL50803_115085	ctg02_12:16392-18811	VSP	Spo11	5’D5N-Pac	53.291	16.6376	3.20305	1.67944	0.00095	0.277406	no
GL50803_115572	GL50803_115572	ctg02_5:219822-228064	Kinase, Wee	Spo11	5’D5N-Pac	43.7004	19.3197	2.26196	1.17757	0.0013	0.331126	no
GL50803_11690	GL50803_11690	ctg02_5:59196-59769	Variant-specific surface protein	Spo11	5’D5N-Pac	15.4179	4.96945	3.10254	1.63345	0.04	0.999159	no
GL50803_11785	GL50803_11785	ctg02_6:109737-110012	hypothetical protein	Spo11	5’D5N-Pac	1040.23	376.047	2.76622	1.46792	0.01535	0.947837	no
GL50803_11884	GL50803_11884	ctg02_1:340000-340288	hypothetical protein	Spo11	5’D5N-Pac	518.077	1165.71	0.44443	-1.16997	0.00505	0.626133	no
GL50803_11930	GL50803_11930	ctg02_2:348465-350412	Retinoic acid induced 17-like protein	Spo11	5’D5N-Pac	82.3746	24.6613	3.34024	1.73995	0.00015	0.0854717	no
GL50803_11950	GL50803_11950	ctg02_2:368726-369288	Ribosomal protein L18	Spo11	5’D5N-Pac	956.836	1936.45	0.494119	-1.01707	0.02165	0.999159	no
GL50803_11976	GL50803_11976	ctg02_2:393754-394075	hypothetical protein	Spo11	5’D5N-Pac	37.2282	99.4515	0.374335	-1.4176	0.0234	0.999159	no
GL50803_12216	GL50803_12216	ctg02_31:86537-88818	Vacuolar ATP synthase subunit B	Spo11	5’D5N-Pac	228.828	493.433	0.463747	-1.10859	0.0176	0.989336	no
GL50803_12220	GL50803_12220	ctg02_31:97955-98642	Hydrolase, putative	Spo11	5’D5N-Pac	159.703	337.973	0.472532	-1.08152	0.0061	0.671494	no
GL50803_12820	GL50803_12820	ctg02_16:83640-84198	ABC transporter family protein	Spo11	5’D5N-Pac	64.4983	144.277	0.447045	-1.16151	0.0222	0.999159	no
GL50803_12853	GL50803_12853	ctg02_46:21806-22631	Molybdopterin biosynthesis MoeB protein	Spo11	5’D5N-Pac	37.6524	87.5779	0.42993	-1.21783	0.0142	0.91985	no
GL50803_12981	GL50803_12981	ctg02_71:6108-6681	Ribosomal protein S5	Spo11	5’D5N-Pac	538.747	1732.27	0.311006	-1.68498	0.0001	0.0648678	no
GL50803_13283	GL50803_13283	ctg02_45:62925-64026	hypothetical protein	Spo11	5’D5N-Pac	34.0346	75.5069	0.450748	-1.14961	0.0147	0.934796	no
GL50803_13475	GL50803_13475	ctg02_3:265533-271908	Axoneme-associated protein GASP-180	Spo11	5’D5N-Pac	38.1859	18.8928	2.02119	1.0152	0.0072	0.7172	no
GL50803_13561	GL50803_13561	ctg02_69:5084-7121	Translation elongation factor	Spo11	5’D5N-Pac	1060.61	3782.54	0.280396	-1.83446	0.03265	0.999159	no
GL50803_13575	GL50803_13575	ctg02_52:29234-29558	Dynein light chain	Spo11	5’D5N-Pac	96.4521	204.751	0.47107	-1.08599	0.0454	0.999159	no
GL50803_13576	GL50803_13576	ctg02_52:30154-30451	hypothetical protein	Spo11	5’D5N-Pac	468.779	1056.75	0.443604	-1.17265	0.0053	0.636796	no
GL50803_13661	GL50803_13661	ctg02_37:42654-43776	Eukaryotic translation initiation factor 3 subunit 2	Spo11	5’D5N-Pac	130.721	277.053	0.471827	-1.08367	0.00285	0.488823	no
GL50803_13667	GL50803_13667	ctg02_8:109994-111533	Notchless	Spo11	5’D5N-Pac	27.2068	58.51	0.464994	-1.10472	0.01425	0.921497	no
GL50803_13728	GL50803_13728	ctg02_63:42069-43026	Variant-specific surface protein	Spo11	5’D5N-Pac	52.5887	25.7445	2.04272	1.03049	0.0398	0.999159	no
GL50803_137604	GL50803_137604	ctg02_55:22740-24858	VSP S8	Spo11	5’D5N-Pac	96.8039	47.1242	2.05423	1.0386	0.00795	0.738173	no
GL50803_137607	GL50803_137607	ctg02_29:3510-4794	VSP	Spo11	5’D5N-Pac	316.559	142.675	2.21874	1.14974	0.0026	0.474603	no
GL50803_137610	GL50803_137610	ctg02_12:550-2476	VSP	Spo11	5’D5N-Pac	56.8451	19.3609	2.93608	1.55389	0.0012	0.315957	no
GL50803_137619	GL50803_137619	ctg02_16:4284-4602	RNA polymerase III subunit C11	Spo11	5’D5N-Pac	18.1746	53.4704	0.3399	-1.55682	0.03645	0.999159	no
GL50803_137621	GL50803_137621	ctg02_84:1257-3092	Hypothetical protein	Spo11	5’D5N-Pac	224.805	52.5854	4.27505	2.09594	5e-05	0.0366148	yes
GL50803_137672	GL50803_137672	ctg02_14:33777-36201	High cysteine membrane protein VSP-like	Spo11	5’D5N-Pac	84.3333	36.9381	2.2831	1.19099	0.00295	0.495992	no
GL50803_137712	GL50803_137712	ctg02_10:183442-202819	hypothetical protein	Spo11	5’D5N-Pac	52.6078	21.4159	2.45648	1.29659	0.01675	0.977916	no
GL50803_13904	GL50803_13904	ctg02_10:50033-50555	hypothetical protein	Spo11	5’D5N-Pac	173.64	395.937	0.438555	-1.18917	0.00325	0.518088	no
GL50803_13922	GL50803_13922	ctg02_38:43552-46881	hypothetical protein	Spo11	5’D5N-Pac	134.724	52.3421	2.57391	1.36396	0.0014	0.347163	no
GL50803_13930	GL50803_13930	ctg02_11:95447-96011	ARF3	Spo11	5’D5N-Pac	182.854	495.187	0.369263	-1.43728	0.00025	0.121417	no
GL50803_14049	GL50803_14049	ctg02_26:49511-49922	Ribosomal protein L32	Spo11	5’D5N-Pac	604.908	1219.69	0.495952	-1.01173	0.0073	0.721031	no
GL50803_14091	GL50803_14091	ctg02_2:199644-200040	Ribosomal protein L14	Spo11	5’D5N-Pac	780.351	2443.11	0.319409	-1.64652	5e-05	0.0366148	yes
GL50803_14164	GL50803_14164	ctg02_1:165313-167749	hypothetical protein	Spo11	5’D5N-Pac	243.527	115.108	2.11564	1.08109	0.00675	0.701058	no
GL50803_14171	GL50803_14171	ctg02_25:45452-45722	Ribosomal protein L37	Spo11	5’D5N-Pac	1327.75	3616.97	0.367089	-1.4458	0.0003	0.134869	no
GL50803_14254	GL50803_14254	ctg02_31:52513-54928	Protein 21.1	Spo11	5’D5N-Pac	222.126	100.255	2.21561	1.1477	0.0062	0.67458	no
GL50803_14259	GL50803_14259	ctg02_5:336664-337282	Glucose 6-phosphate N-acetyltransferase	Spo11	5’D5N-Pac	287.573	68.8515	4.17671	2.06237	5e-05	0.0366148	yes
GL50803_14299	GL50803_14299	ctg02_12:107782-108421	hypothetical protein	Spo11	5’D5N-Pac	107.785	310.018	0.347673	-1.5242	0.0018	0.395132	no
GL50803_14307	GL50803_14307	ctg02_226:49-826	VSP	Spo11	5’D5N-Pac	11.7991	3.798	3.10666	1.63537	0.0362	0.999159	no
GL50803_14457	GL50803_14457	ctg02_68:6746-6935	Ripening regulated protein DDTFR19	Spo11	5’D5N-Pac	2092.15	4768.38	0.438755	-1.18851	0.00495	0.622796	no
GL50803_14478	GL50803_14478	ctg02_14:125118-126420	hypothetical protein	Spo11	5’D5N-Pac	70.1243	26.591	2.63714	1.39898	0.0016	0.370765	no
GL50803_14485	GL50803_14485	ctg02_6:96233-97358	Protein 21.1	Spo11	5’D5N-Pac	97.0693	46.6553	2.08056	1.05697	0.0135	0.900327	no
GL50803_14586	GL50803_14586	ctg02_68:35306-37508	VSP with INR	Spo11	5’D5N-Pac	1236.04	30512.5	0.0405093	-4.6256	0.00305	0.504658	no
GL50803_14621	GL50803_14621	ctg02_4:29167-29920	hypothetical protein	Spo11	5’D5N-Pac	46.0826	98.3929	0.468353	-1.09433	0.02295	0.999159	no
GL50803_14637	GL50803_14637	ctg02_23:112436-113231	hypothetical protein	Spo11	5’D5N-Pac	32.9453	83.6205	0.393986	-1.34378	0.01215	0.865401	no
GL50803_14670	GL50803_14670	ctg02_4:65481-65832	Protein disulfide isomerase PDI3	Spo11	5’D5N-Pac	118.533	331.3	0.357781	-1.48285	0.0066	0.694326	no
GL50803_14677	GL50803_14677	ctg02_3:392716-394516	hypothetical protein	Spo11	5’D5N-Pac	186.519	68.2901	2.73127	1.44957	0.00015	0.0854717	no
GL50803_14699	GL50803_14699	ctg02_39:76740-77172	Ribosomal protein S23	Spo11	5’D5N-Pac	448.658	1160.65	0.386558	-1.37124	0.00045	0.175022	no
GL50803_14819	GL50803_14819	ctg02_11:175422-176037	hypothetical protein	Spo11	5’D5N-Pac	689.789	213.582	3.22962	1.69137	5e-05	0.0366148	yes
GL50803_14833	GL50803_14833	ctg02_24:105582-108715	hypothetical protein	Spo11	5’D5N-Pac	109.442	34.863	3.1392	1.6504	0.00715	0.716406	no
GL50803_14938	GL50803_14938	ctg02_6:11805-15018	Ribosomal protein L12	Spo11	5’D5N-Pac	659.076	1608.24	0.409812	-1.28697	0.03055	0.999159	no
GL50803_15011	GL50803_15011	ctg02_72:18105-18825	hypothetical protein	Spo11	5’D5N-Pac	97.3587	220.769	0.440998	-1.18116	0.00505	0.626133	no
GL50803_15035	GL50803_15035	ctg02_15:222177-225416	Kinase, NEK-like	Spo11	5’D5N-Pac	92.7295	186.064	0.498374	-1.0047	0.03455	0.999159	no
GL50803_15099	GL50803_15099	ctg02_40:36874-37519	20S proteasome alpha subunit 4	Spo11	5’D5N-Pac	191.377	426.223	0.449007	-1.15519	0.0032	0.514051	no
GL50803_15125	GL50803_15125	ctg02_12:142571-143348	hypothetical protein	Spo11	5’D5N-Pac	646.524	227.127	2.84653	1.5092	0.0002	0.105319	no
GL50803_15279	GL50803_15279	ctg02_21:41407-44791	Spo11 Type II DNA topoisomerase VI subunit A	Spo11	5’D5N-Pac	1767.41	54.7194	32.2995	5.01344	0.0265	0.999159	no
GL50803_15427	GL50803_15427	ctg02_1:179671-180382	Giardia trophozoite antigen GTA-2	Spo11	5’D5N-Pac	184.268	643.329	0.286429	-1.80375	0.02155	0.999159	no
GL50803_15535	GL50803_15535	ctg02_2:362891-364061	Deoxyhypusine synthase, putative	Spo11	5’D5N-Pac	66.2246	145.074	0.456488	-1.13135	0.00495	0.622796	no
GL50803_15600	GL50803_15600	ctg02_31:97404-97938	hypothetical protein	Spo11	5’D5N-Pac	68.1178	256.787	0.26527	-1.91447	0.0004	0.16161	no
GL50803_15602	GL50803_15602	ctg02_31:108856-109240	hypothetical protein	Spo11	5’D5N-Pac	67.3917	165.14	0.408088	-1.29305	0.01715	0.982603	no
GL50803_1590	GL50803_1590	ctg02_11:238329-238557	hypothetical protein	Spo11	5’D5N-Pac	64.921	198.543	0.326987	-1.61269	0.01945	0.999159	no
GL50803_15944	GL50803_15944	ctg02_47:62156-62744	hypothetical protein	Spo11	5’D5N-Pac	68.5372	159.063	0.430881	-1.21464	0.0136	0.90346	no
GL50803_15993	GL50803_15993	ctg02_1:723320-727160	BC2-ORF3	Spo11	5’D5N-Pac	57.7769	23.1066	2.50045	1.32219	0.00055	0.197524	no
GL50803_16044	GL50803_16044	ctg02_55:1427-2820	hypothetical protein	Spo11	5’D5N-Pac	1456.32	3316.49	0.439115	-1.18733	0.04345	0.999159	no
GL50803_16114	GL50803_16114	ctg02_64:11969-12278	Ribosomal protein L36-1	Spo11	5’D5N-Pac	1325.57	2967.4	0.446711	-1.16259	0.00195	0.410744	no
GL50803_16160	GL50803_16160	ctg02_58:3181-4264	Cathepsin B precursor	Spo11	5’D5N-Pac	210.746	459.569	0.458573	-1.12478	0.0036	0.541641	no
GL50803_16318	GL50803_16318	ctg02_14:157023-163254	High cysteine membrane protein Group 1	Spo11	5’D5N-Pac	136.72	47.746	2.86349	1.51777	0.00795	0.738173	no
GL50803_16353	GL50803_16353	ctg02_3:378854-381122	hypothetical protein	Spo11	5’D5N-Pac	415.722	182.079	2.2832	1.19105	0.0253	0.999159	no
GL50803_16368	GL50803_16368	ctg02_26:138354-138744	Ribosomal protein L31B	Spo11	5’D5N-Pac	556.035	2063.05	0.269521	-1.89153	5e-05	0.0366148	yes
GL50803_16387	GL50803_16387	ctg02_42:35856-36454	Ribosomal protein L18a	Spo11	5’D5N-Pac	1305.84	3052.59	0.427781	-1.22506	0.0231	0.999159	no
GL50803_16415	GL50803_16415	ctg02_1:765536-767639	hypothetical protein	Spo11	5’D5N-Pac	110.675	53.1822	2.08105	1.05731	0.00565	0.649016	no
GL50803_16486	GL50803_16486	ctg02_13:225141-226191	hypothetical protein	Spo11	5’D5N-Pac	298.805	100.542	2.97194	1.57141	5e-05	0.0366148	yes
GL50803_16588	GL50803_16588	ctg02_11:242499-242868	hypothetical protein	Spo11	5’D5N-Pac	576.028	1388.91	0.414734	-1.26974	0.00085	0.258262	no
GL50803_16717	GL50803_16717	ctg02_13:183046-183929	hypothetical protein	Spo11	5’D5N-Pac	8.03978	31.0185	0.259193	-1.9479	0.04665	0.999159	no
GL50803_16729	GL50803_16729	ctg02_4:324362-326976	Spindle pole protein, putative	Spo11	5’D5N-Pac	244.417	534.448	0.457326	-1.1287	0.0127	0.887051	no
GL50803_16869	GL50803_16869	ctg02_49:57975-65059	hypothetical protein	Spo11	5’D5N-Pac	31.366	15.6181	2.00831	1.00598	0.0297	0.999159	no
GL50803_16942	GL50803_16942	ctg02_1:245467-246253	hypothetical protein	Spo11	5’D5N-Pac	698.24	2024.68	0.344864	-1.5359	0.0085	0.758438	no
GL50803_17080	GL50803_17080	ctg02_50:19968-30966	hypothetical protein	Spo11	5’D5N-Pac	19.2291	8.31859	2.31158	1.20888	0.0142	0.91985	no
GL50803_17120	GL50803_17120	ctg02_3:260056-261679	CEGP1 protein	Spo11	5’D5N-Pac	80.4486	29.9195	2.68884	1.42698	0.0016	0.370765	no
GL50803_17150	GL50803_17150	ctg02_40:56072-56573	NADPH oxidoreductase, putative	Spo11	5’D5N-Pac	115.756	318.326	0.36364	-1.45942	0.00565	0.649016	no
GL50803_17195	GL50803_17195	ctg02_19:129351-129888	hypothetical protein	Spo11	5’D5N-Pac	155.707	318.155	0.489406	-1.0309	0.0139	0.910166	no
GL50803_17249	GL50803_17249	ctg02_8:180967-185995	Coiled-coil protein	Spo11	5’D5N-Pac	256.662	98.1383	2.61531	1.38698	0.0329	0.999159	no
GL50803_17261	GL50803_17261	ctg02_23:128392-129049	hypothetical protein	Spo11	5’D5N-Pac	145.389	292.319	0.497364	-1.00763	0.013	0.895	no
GL50803_17262	GL50803_17262	ctg02_23:129329-130847	hypothetical protein	Spo11	5’D5N-Pac	532.065	229.325	2.32014	1.21421	0.00755	0.729955	no
GL50803_17266	GL50803_17266	ctg02_23:155522-155897	hypothetical protein	Spo11	5’D5N-Pac	48.0606	201.094	0.238996	-2.06494	0.0005	0.184153	no
GL50803_17327	GL50803_17327	ctg02_22:55724-57131	Xaa-Pro dipeptidase	Spo11	5’D5N-Pac	251.071	517.977	0.484715	-1.04479	0.01835	0.999159	no
GL50803_17333	GL50803_17333	ctg02_22:87223-89380	Kinesin-2	Spo11	5’D5N-Pac	231.129	110.401	2.09354	1.06595	0.00805	0.740126	no
GL50803_17337	GL50803_17337	ctg02_22:104210-106970	Ribosomal protein P1B	Spo11	5’D5N-Pac	364.337	1085.88	0.335522	-1.57552	0.0459	0.999159	no
GL50803_17345	GL50803_17345	ctg02_22:151705-152185	Coatomer zeta subunit	Spo11	5’D5N-Pac	138.262	285.91	0.483586	-1.04816	0.01965	0.999159	no
GL50803_17348	GL50803_17348	ctg02_22:162233-163505	hypothetical protein	Spo11	5’D5N-Pac	22.2627	45.2066	0.492466	-1.0219	0.0359	0.999159	no
GL50803_17366	GL50803_17366	ctg02_35:13764-15482	Pyridoxamine 5-phosphate oxidase, putative	Spo11	5’D5N-Pac	62.9645	142.968	0.44041	-1.18308	0.0299	0.999159	no
GL50803_17369	GL50803_17369	ctg02_35:4344-5037	hypothetical protein	Spo11	5’D5N-Pac	61.4505	20.8401	2.94867	1.56006	0.0078	0.736279	no
GL50803_17431	GL50803_17431	ctg02_12:80486-87047	hypothetical protein	Spo11	5’D5N-Pac	61.923	28.9823	2.13658	1.0953	0.00465	0.607052	no
GL50803_17435	GL50803_17435	ctg02_12:44325-45874	hypothetical protein	Spo11	5’D5N-Pac	86.1066	29.3169	2.9371	1.55439	0.0007	0.234335	no
GL50803_17478	GL50803_17478	ctg02_15:43212-59451	Dynein heavy chain	Spo11	5’D5N-Pac	47.7748	23.2533	2.05454	1.03881	0.0184	0.999159	no
GL50803_17531	GL50803_17531	ctg02_41:43939-45355	hypothetical protein	Spo11	5’D5N-Pac	221.584	91.1846	2.43006	1.28099	0.0008	0.248714	no
GL50803_17578	GL50803_17578	ctg02_2:264947-268437	Kinase, NEK-frag	Spo11	5’D5N-Pac	107.802	52.0227	2.07221	1.05117	0.00545	0.638831	no
GL50803_17607	GL50803_17607	ctg02_1:141950-143321	Cathepsin L precursor	Spo11	5’D5N-Pac	60.832	29.8589	2.03732	1.02667	0.021	0.999159	no
GL50803_18368	GL50803_18368	ctg02_81:700-1489	Hypothetical protein	Spo11	5’D5N-Pac	543.249	82.9884	6.54608	2.71063	5e-05	0.0366148	yes
GL50803_18722	GL50803_18722	ctg02_2:246962-247694	hypothetical protein	Spo11	5’D5N-Pac	126.556	36.0334	3.51219	1.81237	0.0147	0.934796	no
GL50803_19150	GL50803_19150	ctg02_28:84352-86899	hypothetical protein	Spo11	5’D5N-Pac	304.499	37.4684	8.12682	3.02269	0.0361	0.999159	no
GL50803_1995	GL50803_1995	ctg02_19:128636-129290	Proteasome subunit beta type 4 precursor	Spo11	5’D5N-Pac	131.604	278.15	0.47314	-1.07966	0.0087	0.762136	no
GL50803_2013	GL50803_2013	ctg02_4:318422-319031	Glutaredoxin-related protein	Spo11	5’D5N-Pac	120.036	266.61	0.450231	-1.15126	0.00605	0.668739	no
GL50803_20551	GL50803_20551	ctg02_35:88296-88746	hypothetical protein	Spo11	5’D5N-Pac	10.6779	28.1657	0.37911	-1.39931	0.0491	0.999159	no
GL50803_20633	GL50803_20633	ctg02_6:31501-31894	SOH1 protein, putative	Spo11	5’D5N-Pac	537.955	208.57	2.57925	1.36695	0.00205	0.42093	no
GL50803_21048	GL50803_21048	ctg02_13:46310-58415	hypothetical protein	Spo11	5’D5N-Pac	57.0713	23.4269	2.43614	1.2846	0.0049	0.621091	no
GL50803_21232	GL50803_21232	ctg02_62:7010-9737	hypothetical protein	Spo11	5’D5N-Pac	65.5776	22.1374	2.9623	1.56672	0.00015	0.0854717	no
GL50803_21411	GL50803_21411	ctg02_7:185456-191393	ABC transporter, ATP-binding protein	Spo11	5’D5N-Pac	164.529	71.5274	2.30022	1.20177	0.03455	0.999159	no
GL50803_21423	GL50803_21423	ctg02_7:234818-238217	Beta adaptin	Spo11	5’D5N-Pac	332.635	161.707	2.05702	1.04056	0.0491	0.999159	no
GL50803_21525	GL50803_21525	ctg02_32:73306-73657	hypothetical protein	Spo11	5’D5N-Pac	136.739	291.881	0.468475	-1.09396	0.0292	0.999159	no
GL50803_2178	GL50803_2178	ctg02_74:4950-5103	Hypothetical protein	Spo11	5’D5N-Pac	462.68	1091.21	0.424006	-1.23784	0.04845	0.999159	no
GL50803_22204	GL50803_22204	ctg02_63:38455-40204	Methionyl-tRNA synthetase	Spo11	5’D5N-Pac	65.4994	156.897	0.417468	-1.26026	0.0013	0.331126	no
GL50803_22454	GL50803_22454	ctg02_16:19714-20206	ARF GAP	Spo11	5’D5N-Pac	82.7046	171.574	0.482035	-1.05279	0.0322	0.999159	no
GL50803_23004	GL50803_23004	ctg02_16:191530-192022	hypothetical protein	Spo11	5’D5N-Pac	291.352	704.661	0.413464	-1.27417	0.00105	0.289473	no
GL50803_2351	GL50803_2351	ctg02_71:5085-6042	Protein 21.1	Spo11	5’D5N-Pac	67.9285	137.347	0.494576	-1.01574	0.0176	0.989336	no
GL50803_23620	GL50803_23620	ctg02_2:561550-561679	hypothetical protein	Spo11	5’D5N-Pac	90.8521	394.436	0.230334	-2.1182	0.04955	0.999159	no
GL50803_24321	GL50803_24321	ctg02_47:60859-61726	Kinase, NEK	Spo11	5’D5N-Pac	341.445	730.151	0.467636	-1.09654	0.0045	0.600431	no
GL50803_24412	GL50803_24412	ctg02_10:39339-40863	Protein 21.1	Spo11	5’D5N-Pac	390.766	163.328	2.39252	1.25853	0.00575	0.65409	no
GL50803_2452	GL50803_2452	ctg02_70:12390-13386	Ornithine cyclodeaminase	Spo11	5’D5N-Pac	37.6075	92.5857	0.406191	-1.29977	0.00645	0.689771	no
GL50803_24528	GL50803_24528	ctg02_26:50006-51221	hypothetical protein	Spo11	5’D5N-Pac	56.8729	116.426	0.48849	-1.0336	0.01345	0.898911	no
GL50803_24880	GL50803_24880	ctg02_1:260909-265901	High cysteine membrane protein Group 2	Spo11	5’D5N-Pac	302.849	136.231	2.22305	1.15254	0.02015	0.999159	no
GL50803_26369	GL50803_26369	ctg02_3:99572-99743	hypothetical protein	Spo11	5’D5N-Pac	134.097	644.77	0.207976	-2.26551	0.0035	0.53606	no
GL50803_26925	GL50803_26925	ctg02_22:104210-106970	hypothetical protein	Spo11	5’D5N-Pac	517.154	1683.22	0.307241	-1.70256	0.00465	0.607052	no
GL50803_27088	GL50803_27088	ctg02_14:194570-195227	hypothetical protein	Spo11	5’D5N-Pac	1.73649	5.93668	0.292502	-1.77348	0.0466	0.999159	no
GL50803_27266	GL50803_27266	ctg02_33:39753-40190	[2Fe-2S] ferredoxin	Spo11	5’D5N-Pac	180.94	460.233	0.393149	-1.34685	0.00265	0.477224	no
GL50803_27500	GL50803_27500	ctg02_1:518126-518633	hypothetical protein	Spo11	5’D5N-Pac	801.058	241.443	3.31779	1.73022	0.0282	0.999159	no
GL50803_27910	GL50803_27910	ctg02_1:132541-132919	hypothetical protein	Spo11	5’D5N-Pac	28.4494	71.9863	0.395206	-1.33932	0.03325	0.999159	no
GL50803_28069	GL50803_28069	ctg02_11:257271-257556	hypothetical protein	Spo11	5’D5N-Pac	102.986	313.055	0.328971	-1.60397	0.00665	0.695682	no
GL50803_2822	GL50803_2822	ctg02_21:29602-31286	hypothetical protein	Spo11	5’D5N-Pac	174.059	77.3932	2.24902	1.1693	0.0153	0.946621	no
GL50803_2825	GL50803_2825	ctg02_21:28497-28866	Ribosomal protein L7Ae	Spo11	5’D5N-Pac	100.162	301.558	0.332148	-1.5901	0.00285	0.488823	no
GL50803_28464	GL50803_28464	ctg02_4:58020-58442	hypothetical protein	Spo11	5’D5N-Pac	326.769	879.605	0.371495	-1.42858	0.00035	0.146787	no
GL50803_2897	GL50803_2897	ctg02_21:33370-35695	Furin precursor putative serine protease	Spo11	5’D5N-Pac	248.837	65.9796	3.77142	1.91511	5e-05	0.0366148	yes
GL50803_29181	GL50803_29181	ctg02_5:294384-295532	hypothetical protein	Spo11	5’D5N-Pac	27.0285	57.0677	0.473622	-1.07819	0.0221	0.999159	no
GL50803_29256	GL50803_29256	ctg02_29:140089-140389	Dynein heavy chain like	Spo11	5’D5N-Pac	7.41242	30.4197	0.243672	-2.03699	0.04215	0.999159	no
GL50803_29630	GL50803_29630	ctg02_6:157201-157549	hypothetical protein	Spo11	5’D5N-Pac	8.24993	27.7568	0.297222	-1.75039	0.0495	0.999159	no
GL50803_30764	GL50803_30764	ctg02_212:324-705	Hypothetical protein	Spo11	5’D5N-Pac	647.606	97.2128	6.66174	2.7359	5e-05	0.0366148	yes
GL50803_30848	GL50803_30848	ctg02_186:503-863	Hypothetical protein	Spo11	5’D5N-Pac	82.5091	16.356	5.04458	2.33473	0.00275	0.48181	no
GL50803_30851	GL50803_30851	ctg02_45:39789-40075	hypothetical protein	Spo11	5’D5N-Pac	227.686	511.037	0.445537	-1.16638	0.0312	0.999159	no
GL50803_31022	GL50803_31022	ctg02_36:19783-20600	hypothetical protein	Spo11	5’D5N-Pac	18.5737	105.233	0.176501	-2.50225	0.03265	0.999159	no
GL50803_31113	GL50803_31113	ctg02_9:233570-234711	hypothetical protein	Spo11	5’D5N-Pac	410.248	947.16	0.433135	-1.20711	0.00725	0.717605	no
GL50803_31366	GL50803_31366	ctg02_66:21820-22249	hypothetical protein	Spo11	5’D5N-Pac	559.854	133.347	4.19847	2.06987	5e-05	0.0366148	yes
GL50803_3154	GL50803_3154	ctg02_41:41618-41882	hypothetical protein	Spo11	5’D5N-Pac	80.3083	200.896	0.399751	-1.32283	0.0346	0.999159	no
GL50803_31655	GL50803_31655	ctg02_132:715-1483	Hypothetical protein	Spo11	5’D5N-Pac	287.469	49.0161	5.86479	2.55208	0.00045	0.175022	no
GL50803_31657	GL50803_31657	ctg02_56:57530-59572	hypothetical protein	Spo11	5’D5N-Pac	255.834	48.2049	5.30722	2.40796	0.0006	0.210244	no
GL50803_31679	GL50803_31679	ctg02_80:657-1213	Hypothetical protein	Spo11	5’D5N-Pac	135.191	29.8743	4.52533	2.17802	0.00195	0.410744	no
GL50803_31783	GL50803_31783	ctg02_13:183046-183929	hypothetical protein	Spo11	5’D5N-Pac	25.5213	72.9994	0.34961	-1.51618	0.0169	0.980263	no
GL50803_31989	GL50803_31989	ctg02_10:37612-38008	hypothetical protein	Spo11	5’D5N-Pac	1937.28	6408.1	0.302317	-1.72586	0.00905	0.770475	no
GL50803_3202	GL50803_3202	ctg02_45:64089-64353	hypothetical protein	Spo11	5’D5N-Pac	66.9869	189.544	0.353411	-1.50058	0.0173	0.986074	no
GL50803_32045	GL50803_32045	ctg02_5:266675-270387	hypothetical protein	Spo11	5’D5N-Pac	14.283	5.90104	2.42042	1.27526	0.0214	0.999159	no
GL50803_3209	GL50803_3209	ctg02_21:18708-19338	Proteasome subunit beta type 2	Spo11	5’D5N-Pac	154.336	319.796	0.482608	-1.05108	0.0095	0.789777	no
GL50803_32108	GL50803_32108	ctg02_2:136498-137320	hypothetical protein	Spo11	5’D5N-Pac	206.704	507.653	0.407176	-1.29628	0.0427	0.999159	no
GL50803_32155	GL50803_32155	ctg02_2:567410-567623	hypothetical protein	Spo11	5’D5N-Pac	343.127	136.111	2.52094	1.33396	0.0328	0.999159	no
GL50803_32235	GL50803_32235	ctg02_1:639834-640801	hypothetical protein	Spo11	5’D5N-Pac	65.6865	136.402	0.481566	-1.0542	0.04	0.999159	no
GL50803_32908	GL50803_32908	ctg02_2:599842-603005	hypothetical protein	Spo11	5’D5N-Pac	164.968	341.024	0.483743	-1.04769	0.0147	0.934796	no
GL50803_33232	GL50803_33232	ctg02_4:57147-57891	GARP-like protein 4	Spo11	5’D5N-Pac	84.8501	369.716	0.229501	-2.12343	5e-05	0.0366148	yes
GL50803_3331	GL50803_3331	ctg02_16:6196-7192	Malate dehydrogenase	Spo11	5’D5N-Pac	514.638	1068.66	0.481573	-1.05417	0.02915	0.999159	no
GL50803_33672	GL50803_33672	ctg02_3:163089-165198	hypothetical protein	Spo11	5’D5N-Pac	148.572	59.6442	2.49097	1.31671	0.0008	0.248714	no
GL50803_34093	GL50803_34093	ctg02_2:69717-69951	hypothetical protein	Spo11	5’D5N-Pac	2176.39	5613.12	0.387733	-1.36687	0.0003	0.134869	no
GL50803_34649	GL50803_34649	ctg02_40:56072-56573	hypothetical protein	Spo11	5’D5N-Pac	429.912	1738.58	0.247278	-2.0158	0.00465	0.607052	no
GL50803_3549	GL50803_3549	ctg02_15:71319-72282	hypothetical protein	Spo11	5’D5N-Pac	189.918	86.1289	2.20504	1.14081	0.0048	0.616333	no
GL50803_35985	GL50803_35985	ctg02_27:9660-11790	High cysteine protein	Spo11	5’D5N-Pac	1267.09	316.006	4.0097	2.0035	0.00365	0.546969	no
GL50803_37093	GL50803_37093	ctg02_3:465729-467756	VSP	Spo11	5’D5N-Pac	40.3588	17.2156	2.34432	1.22917	0.0108	0.82639	no
GL50803_3786	GL50803_3786	ctg02_16:129538-132320	hypothetical protein	Spo11	5’D5N-Pac	48.3179	145.046	0.333121	-1.58588	0.0367	0.999159	no
GL50803_37869	GL50803_37869	ctg02_1:179671-180382	hypothetical protein	Spo11	5’D5N-Pac	1638.18	6902.83	0.23732	-2.07509	0.00095	0.277406	no
GL50803_38378	GL50803_38378	ctg02_1:463167-463323	hypothetical protein	Spo11	5’D5N-Pac	1485.49	3661.28	0.40573	-1.30141	0.013	0.895	no
GL50803_3910	GL50803_3910	ctg02_3:6518-7276	hypothetical protein	Spo11	5’D5N-Pac	140.115	301.504	0.46472	-1.10557	0.0289	0.999159	no
GL50803_39312	GL50803_39312	ctg02_53:14402-28910	Midasin	Spo11	5’D5N-Pac	28.9863	14.0405	2.06448	1.04578	0.0055	0.638831	no
GL50803_39432	GL50803_39432	ctg02_5:266675-270387	hypothetical protein	Spo11	5’D5N-Pac	3.71801	0.683221	5.44188	2.44411	0.0153	0.946621	no
GL50803_41472	GL50803_41472	ctg02_10:88745-90509	VSP	Spo11	5’D5N-Pac	376.93	165.273	2.28065	1.18945	0.00495	0.622796	no
GL50803_4188	GL50803_4188	ctg02_33:20441-21332	hypothetical protein	Spo11	5’D5N-Pac	470.46	218.956	2.14865	1.10343	0.0047	0.61145	no
GL50803_4192	GL50803_4192	ctg02_33:23207-23801	ARL2	Spo11	5’D5N-Pac	12.9165	39.8034	0.324507	-1.62368	0.0117	0.849816	no
GL50803_42285	GL50803_42285	ctg02_43:9806-32160	Ciliary dynein heavy chain 11	Spo11	5’D5N-Pac	30.5617	15.2536	2.00357	1.00258	0.02105	0.999159	no
GL50803_4245	GL50803_4245	ctg02_16:14886-16254	hypothetical protein	Spo11	5’D5N-Pac	106.591	42.4191	2.51281	1.3293	0.00135	0.341081	no
GL50803_4344	GL50803_4344	ctg02_1:59883-60297	hypothetical protein	Spo11	5’D5N-Pac	91.0179	203.646	0.446942	-1.16184	0.02595	0.999159	no
GL50803_4606	GL50803_4606	ctg02_8:104280-104988	Methionyl-tRNA synthetase	Spo11	5’D5N-Pac	276.098	633.131	0.436084	-1.19732	0.00185	0.399098	no
GL50803_4689	GL50803_4689	ctg02_36:73578-74770	hypothetical protein	Spo11	5’D5N-Pac	69.1997	149.237	0.46369	-1.10877	0.04505	0.999159	no
GL50803_4820	GL50803_4820	ctg02_35:49663-50149	hypothetical protein	Spo11	5’D5N-Pac	133.809	317.261	0.421763	-1.2455	0.00535	0.636796	no
GL50803_4883	GL50803_4883	ctg02_33:71921-76301	hypothetical protein	Spo11	5’D5N-Pac	90.4871	38.7964	2.33236	1.22179	0.0011	0.297568	no
GL50803_5010	GL50803_5010	ctg02_13:246122-247157	Ser/Thr phosphatase PP2A-2 catalytic subunit	Spo11	5’D5N-Pac	387.357	795.756	0.486779	-1.03866	0.0172	0.983964	no
GL50803_5488	GL50803_5488	ctg02_1:518126-518633	FEN-1 nuclease	Spo11	5’D5N-Pac	1169.55	561.41	2.08324	1.05883	0.01215	0.865401	no
GL50803_5513	GL50803_5513	ctg02_27:73819-74203	hypothetical protein	Spo11	5’D5N-Pac	74.9281	171.985	0.435666	-1.1987	0.02665	0.999159	no
GL50803_5517	GL50803_5517	ctg02_27:74792-75164	Ribosomal protein L37a	Spo11	5’D5N-Pac	612.871	1997.62	0.306801	-1.70463	0.00015	0.0854717	no
GL50803_5568	GL50803_5568	ctg02_16:200246-200708	hypothetical protein	Spo11	5’D5N-Pac	44.8342	96.8698	0.462829	-1.11145	0.04245	0.999159	no
GL50803_5593	GL50803_5593	ctg02_19:22088-22754	Ribosomal protein L11	Spo11	5’D5N-Pac	466.255	1167.42	0.399389	-1.32413	0.0003	0.134869	no
GL50803_5604	GL50803_5604	ctg02_53:9894-10302	hypothetical protein	Spo11	5’D5N-Pac	496.013	1116.22	0.444368	-1.17017	0.0018	0.395132	no
GL50803_5613	GL50803_5613	ctg02_54:30615-31392	hypothetical protein	Spo11	5’D5N-Pac	109.503	237.871	0.460346	-1.11921	0.0065	0.691568	no
GL50803_5947	GL50803_5947	ctg02_22:152272-152644	Ribosomal protein L35a	Spo11	5’D5N-Pac	735.99	1755.49	0.41925	-1.25412	0.001	0.283184	no
GL50803_5999	GL50803_5999	ctg02_59:4914-6486	Kinase, NEK	Spo11	5’D5N-Pac	71.1979	144.408	0.493033	-1.02024	0.0089	0.76817	no
GL50803_6184	GL50803_6184	ctg02_24:22196-23264	Branched-chain amino acid aminotransferase lateral transfer candidate	Spo11	5’D5N-Pac	272.133	591.732	0.459892	-1.12063	0.00515	0.632259	no
GL50803_6199	GL50803_6199	ctg02_24:9646-14773	Kinase, STE Dicty2	Spo11	5’D5N-Pac	55.1949	16.1641	3.41466	1.77174	5e-05	0.0366148	yes
GL50803_6344	GL50803_6344	ctg02_1:100636-101320	Protein 21.1	Spo11	5’D5N-Pac	83.4178	175.914	0.474196	-1.07644	0.01415	0.918833	no
GL50803_6372	GL50803_6372	ctg02_43:40550-42152	High cysteine protein	Spo11	5’D5N-Pac	662.969	302.507	2.19158	1.13197	0.02895	0.999159	no
GL50803_6391	GL50803_6391	ctg02_40:5619-5727	hypothetical protein	Spo11	5’D5N-Pac	32.0381	192.461	0.166465	-2.58671	0.0491	0.999159	no
GL50803_6524	GL50803_6524	ctg02_13:129054-129588	Ubiquitin-conjugating enzyme E2-28.4 kDa	Spo11	5’D5N-Pac	41.71	106.621	0.391199	-1.35403	0.0281	0.999159	no
GL50803_6535	GL50803_6535	ctg02_13:119921-120236	hypothetical protein	Spo11	5’D5N-Pac	138.333	332.876	0.415569	-1.26684	0.01495	0.941117	no
GL50803_6563	GL50803_6563	ctg02_20:15770-16406	Uracil phosphoribosyltransferase	Spo11	5’D5N-Pac	134.341	307.267	0.437213	-1.19359	0.0034	0.528517	no
GL50803_6724	GL50803_6724	ctg02_10:37612-38008	Protein F17L21.10	Spo11	5’D5N-Pac	311.087	787.868	0.394847	-1.34064	0.0056	0.645646	no
GL50803_7082	GL50803_7082	ctg02_2:73559-73829	Ribosomal protein S21	Spo11	5’D5N-Pac	1265.73	2580.82	0.490437	-1.02786	0.00735	0.722922	no
GL50803_7107	GL50803_7107	ctg02_20:108752-108857	hypothetical protein	Spo11	5’D5N-Pac	1353.41	3477.83	0.389154	-1.36159	0.03765	0.999159	no
GL50803_7350	GL50803_7350	ctg02_6:216975-221595	hypothetical protein	Spo11	5’D5N-Pac	118.845	51.9375	2.28823	1.19423	0.00345	0.532755	no
GL50803_7374	GL50803_7374	ctg02_11:41930-42323	hypothetical protein	Spo11	5’D5N-Pac	434.032	115.724	3.75058	1.90711	5e-05	0.0366148	yes
GL50803_7413	GL50803_7413	ctg02_59:22721-23174	hypothetical protein	Spo11	5’D5N-Pac	123.454	247.032	0.499749	-1.00072	0.0247	0.999159	no
GL50803_7598	GL50803_7598	ctg02_35:37440-38028	hypothetical protein	Spo11	5’D5N-Pac	205.803	80.5167	2.55603	1.3539	0.003	0.501698	no
GL50803_7797	GL50803_7797	ctg02_18:165332-166241	Alpha-5 giardin	Spo11	5’D5N-Pac	237.306	115.877	2.04791	1.03415	0.0109	0.827507	no
GL50803_7825	GL50803_7825	ctg02_22:19504-20104	hypothetical protein	Spo11	5’D5N-Pac	105.262	240.417	0.437831	-1.19155	0.00575	0.65409	no
GL50803_7982	GL50803_7982	ctg02_1:846958-848116	UDP-glucose 4-epimerase	Spo11	5’D5N-Pac	176.529	81.619	2.16284	1.11293	0.00895	0.768312	no
GL50803_7999	GL50803_7999	ctg02_6:181180-181896	Ribosomal protein S3	Spo11	5’D5N-Pac	789.25	1641.84	0.480711	-1.05676	0.01855	0.999159	no
GL50803_8001	GL50803_8001	ctg02_6:182767-183412	Ribosomal protein L15	Spo11	5’D5N-Pac	197.163	438.136	0.450004	-1.15199	0.0046	0.605585	no
GL50803_8055	GL50803_8055	ctg02_4:28158-29082	hypothetical protein	Spo11	5’D5N-Pac	234.459	925.892	0.253225	-1.98151	5e-05	0.0366148	yes
GL50803_8242	GL50803_8242	ctg02_4:59252-59444	Ribosome biogenesis protein Nop10	Spo11	5’D5N-Pac	746.585	1566.55	0.476579	-1.06921	0.03705	0.999159	no
GL50803_8250	GL50803_8250	ctg02_4:65903-66380	hypothetical protein	Spo11	5’D5N-Pac	193.682	497.472	0.389332	-1.36093	0.00105	0.289473	no
GL50803_8253	GL50803_8253	ctg02_3:377971-378418	hypothetical protein	Spo11	5’D5N-Pac	155.592	360.744	0.431309	-1.21321	0.0053	0.636796	no
GL50803_8325	GL50803_8325	ctg02_17:92052-92706	hypothetical protein	Spo11	5’D5N-Pac	31.2895	67.6685	0.462394	-1.11281	0.03235	0.999159	no
GL50803_8559	GL50803_8559	ctg02_7:138116-138638	Vacuolar ATP synthase 16 kDa proteolipid subunit	Spo11	5’D5N-Pac	187.787	659.797	0.284613	-1.81293	0.0001	0.0648678	no
GL50803_8616	GL50803_8616	ctg02_63:17920-18367	hypothetical protein	Spo11	5’D5N-Pac	62.601	143.09	0.437494	-1.19267	0.0236	0.999159	no
GL50803_86906	GL50803_86906	ctg02_2:629563-629887	hypothetical protein	Spo11	5’D5N-Pac	358.35	138.125	2.59439	1.37539	0.00775	0.735262	no
GL50803_87706	GL50803_87706	ctg02_39:124-1171	High cysteine protein	Spo11	5’D5N-Pac	1.35094	4.16837	0.324093	-1.62552	0.0448	0.999159	no
GL50803_8792	GL50803_8792	ctg02_16:186118-186253	hypothetical protein	Spo11	5’D5N-Pac	2462.47	920.967	2.67379	1.41888	0.0204	0.999159	no
GL50803_88814	GL50803_88814	ctg02_5:152952-153840	Protein kinase	Spo11	5’D5N-Pac	154.572	45.9594	3.36323	1.74985	0.0014	0.347163	no
GL50803_8890	GL50803_8890	ctg02_21:161413-163012	hypothetical protein	Spo11	5’D5N-Pac	111.671	52.3173	2.13449	1.09389	0.0053	0.636796	no
GL50803_8896	GL50803_8896	ctg02_11:147134-148133	hypothetical protein	Spo11	5’D5N-Pac	21.4475	49.8565	0.430185	-1.21697	0.0188	0.999159	no
GL50803_9088	GL50803_9088	ctg02_6:297376-297937	4-methyl-5-thiazole monophosphate biosynthesis enzyme	Spo11	5’D5N-Pac	198.632	405.485	0.489863	-1.02955	0.00935	0.784965	no
GL50803_91934	GL50803_91934	ctg02_21:103726-107545	hypothetical protein	Spo11	5’D5N-Pac	31.3667	12.8712	2.43697	1.28509	0.00285	0.488823	no
GL50803_93584	GL50803_93584	ctg02_46:5235-5481	hypothetical protein	Spo11	5’D5N-Pac	0.001	85.874	1.1645e-05	-16.3899	5e-05	0.0366148	yes
GL50803_94440	GL50803_94440	ctg02_8:120553-137287	Dynein heavy chain	Spo11	5’D5N-Pac	41.8338	19.075	2.19312	1.13299	0.0102	0.812653	no
GL50803_9477	GL50803_9477	ctg02_17:186959-187595	hypothetical protein	Spo11	5’D5N-Pac	85.8997	204.798	0.419436	-1.25348	0.00525	0.636615	no
GL50803_9541	GL50803_9541	ctg02_8:91270-91870	TRAPPC5/Trs31	Spo11	5’D5N-Pac	35.7419	90.7082	0.394032	-1.34362	0.019	0.999159	no
GL50803_9548	GL50803_9548	ctg02_56:2186-3755	Cathepsin L precursor	Spo11	5’D5N-Pac	204.094	74.2598	2.74838	1.45858	5e-05	0.0366148	yes
GL50803_9551	GL50803_9551	ctg02_56:4206-4353	hypothetical protein	Spo11	5’D5N-Pac	1501.56	604.242	2.48503	1.31326	0.035	0.999159	no
GL50803_97627	GL50803_97627	ctg02_145:79-599	Hypothetical protein	Spo11	5’D5N-Pac	37.0057	12.8156	2.88755	1.52985	0.0342	0.999159	no
GL50803_9778	GL50803_9778	ctg02_15:210868-211459	Tem-1-like protein	Spo11	5’D5N-Pac	75.2463	197.432	0.381125	-1.39166	0.0117	0.849816	no
GL50803_9779	GL50803_9779	ctg02_15:209793-210726	UPL-1	Spo11	5’D5N-Pac	636.047	1316.72	0.483054	-1.04974	0.0415	0.999159	no
GL50803_9810	GL50803_9810	ctg02_34:65092-65413	Ribosomal protein L44	Spo11	5’D5N-Pac	1179.25	2947.02	0.40015	-1.32139	0.0005	0.184153	no
GL50803_98178	GL50803_98178	ctg02_38:4172-4487	hypothetical protein	Spo11	5’D5N-Pac	1096.51	114.084	9.61143	3.26475	5e-05	0.0366148	yes
GL50803_98226	GL50803_98226	ctg02_8:203614-205375	hypothetical protein	Spo11	5’D5N-Pac	70.3812	180.904	0.389053	-1.36196	0.02245	0.999159	no
GL50803_98682	GL50803_98682	ctg02_2:565626-565749	hypothetical protein	Spo11	5’D5N-Pac	56.4825	0.001	56482.5	15.7855	0.0342	0.999159	no
GL50803_98760	GL50803_98760	ctg02_7:13009-13180	hypothetical protein	Spo11	5’D5N-Pac	271.771	979.091	0.277575	-1.84905	0.0066	0.694326	no
GL50803_98867	GL50803_98867	ctg02_10:83629-83827	hypothetical protein	Spo11	5’D5N-Pac	282.037	80.7953	3.49076	1.80354	0.0157	0.956532	no
GL50803_99389	GL50803_99389	ctg02_54:552-795	hypothetical protein	Spo11	5’D5N-Pac	118.667	274.191	0.43279	-1.20826	0.0473	0.999159	no
GL50803_t0031	GL50803_t0031	ctg02_20:15634-15706	0	Spo11	5’D5N-Pac	115.846	0.001	115846	16.8218	0.0134	0.898911	no
GL50803_t0038	GL50803_t0038	ctg02_25:47776-47848	0	Spo11	5’D5N-Pac	132.577	0.001	132577	17.0165	0.0134	0.898911	no
